# Supplementary material for: Regioselective one-pot three-component synthesis of quinoline based 1,2,4-triazolo[1,5-a]quinoline derivatives
Source: Royal Society of Chemistry journal article supplement (doi:10.1039/c5ra15560f), 2015-01-01

**Regioselective one-pot three-component synthesis of quinoline based [1,2,4]triazolo[1,5-*a*]quinoline derivatives.**

*Gaurav G. Ladani and Manish P. Patel\**

*Department of Chemistry, Sardar Patel University, Vallabh Vidyanagar 388120, Gujarat, India*

*\*E-mail: [patelmanish1069@yahoo.com](mailto:patelmanish1069@yahoo.com)*

*Tel.: +91 02692 226856; Ext.: 212*

**Supporting information**

<sup>1</sup>H NMR of compound 4a

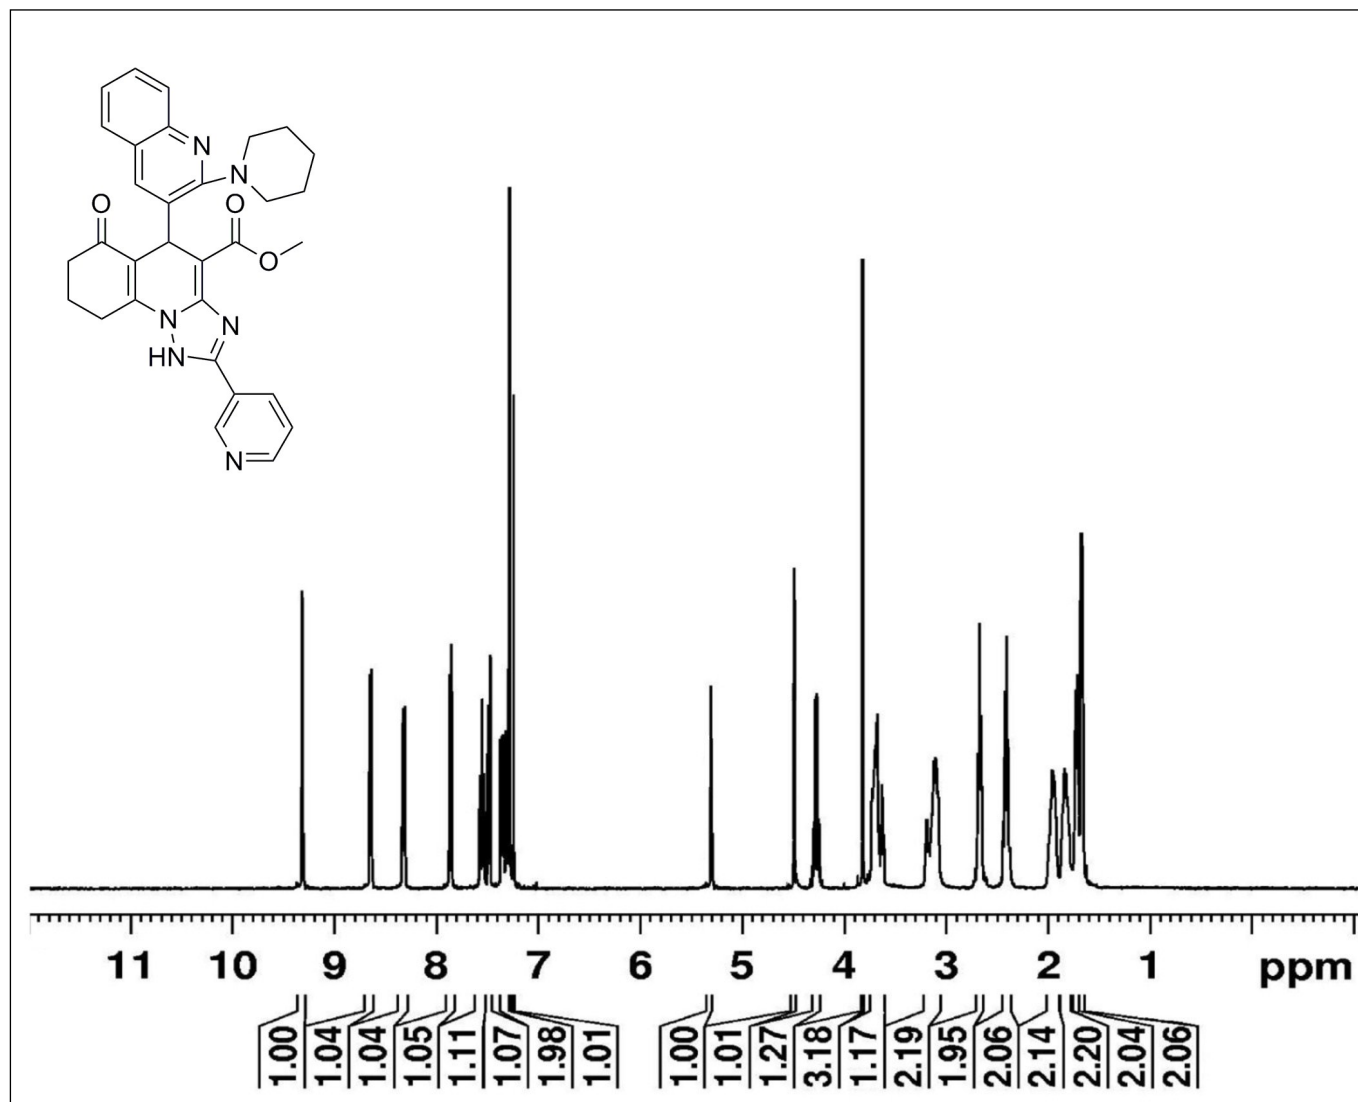

<sup>13</sup>C NMR of compound 4a

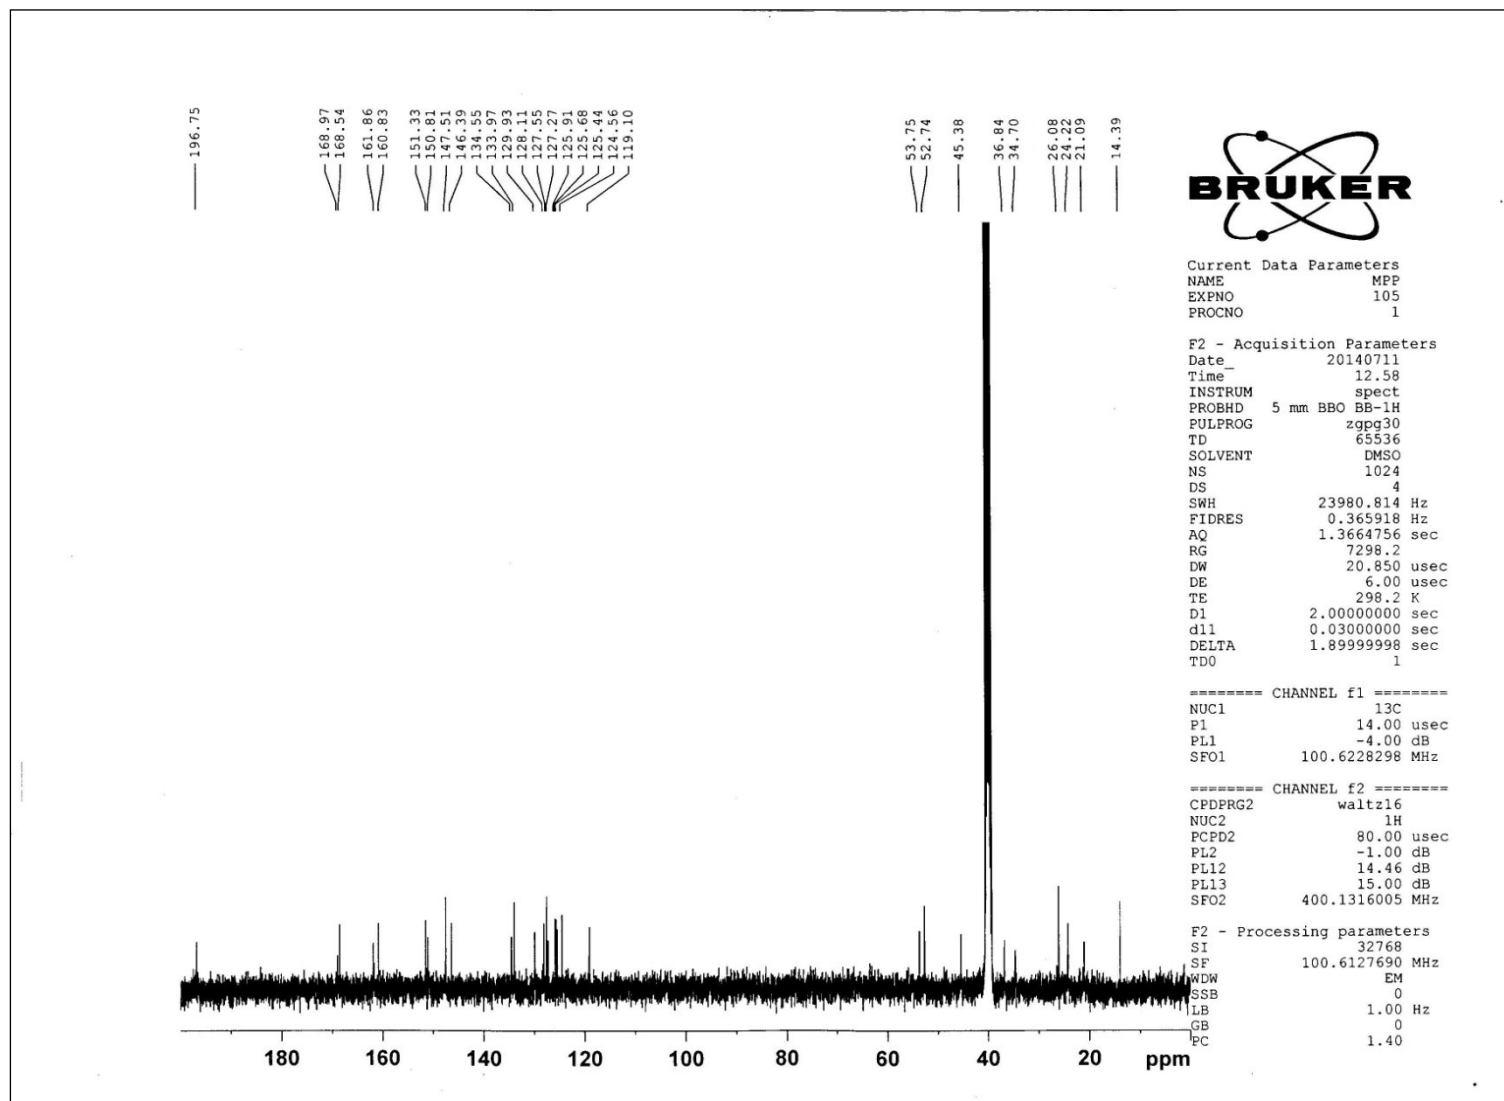

# Mass of compound 4a

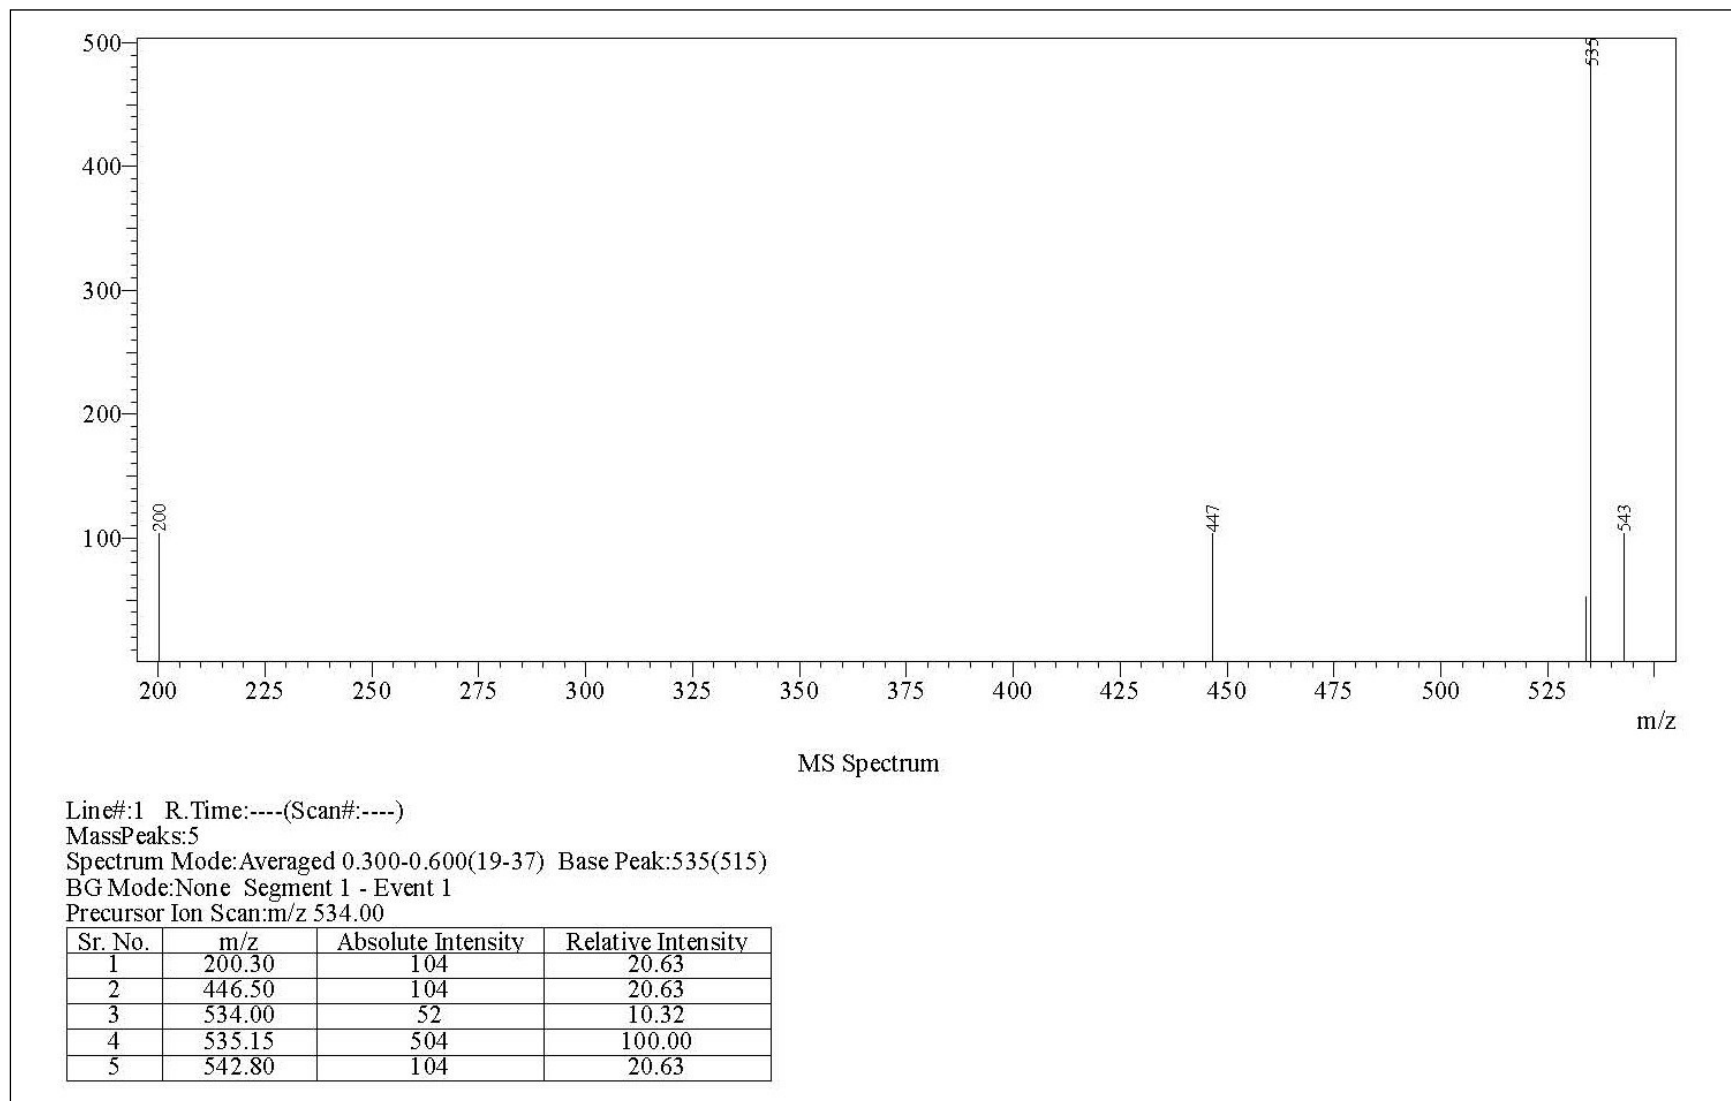

<sup>1</sup>H NMR of compound 4b

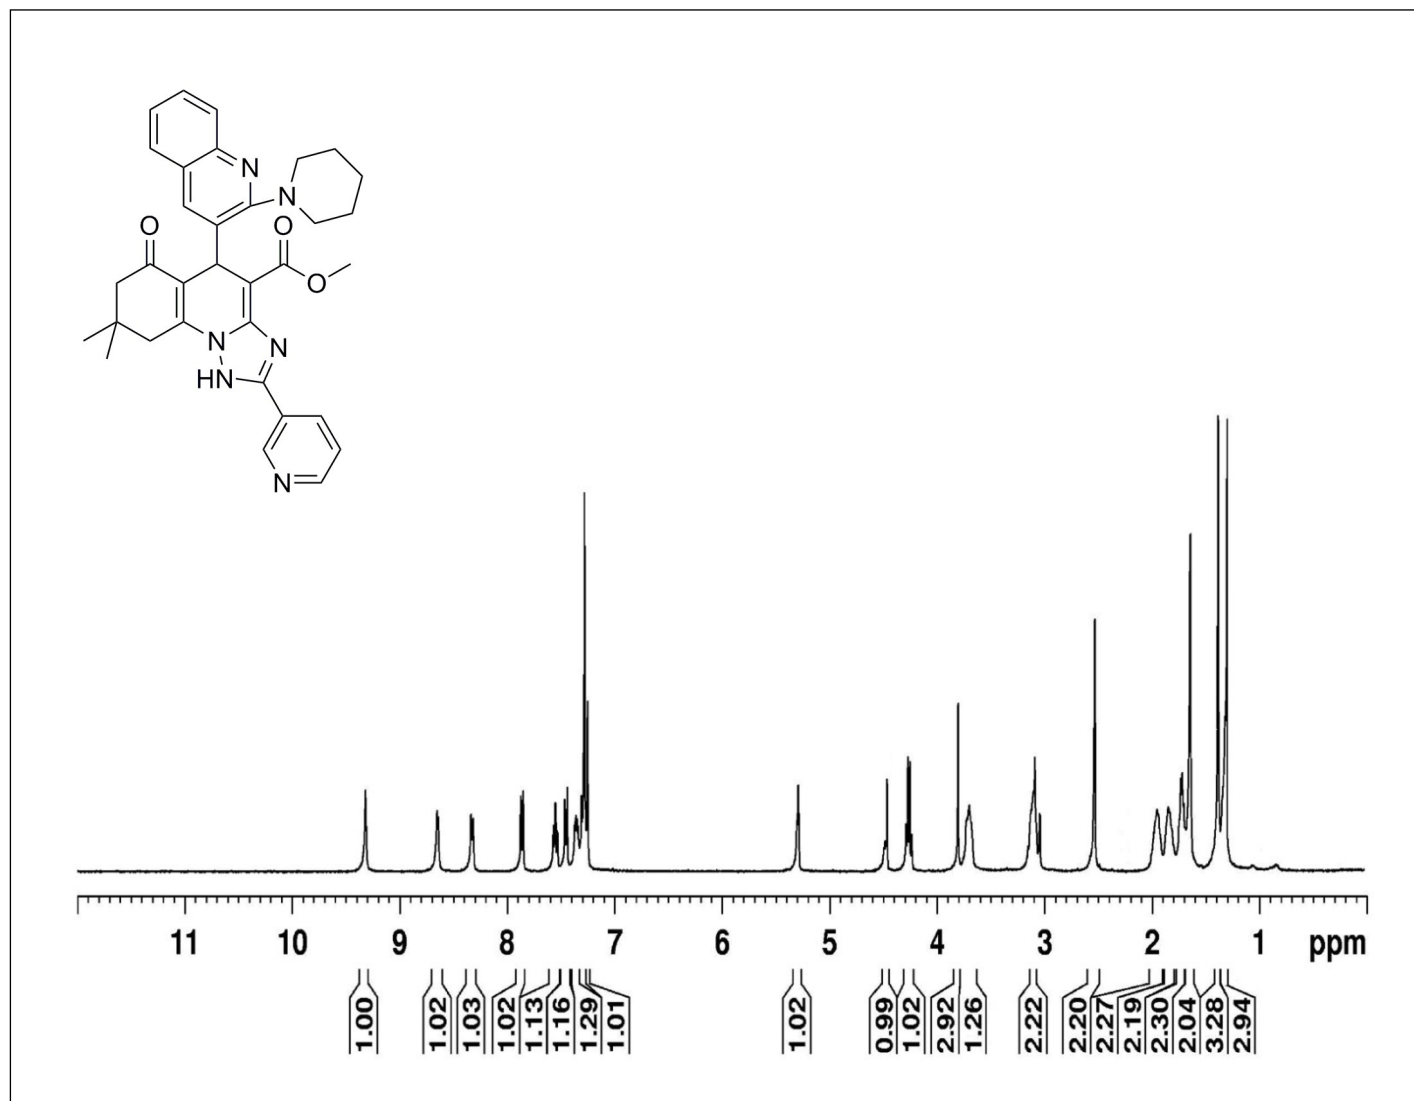

Mass of compound 4b

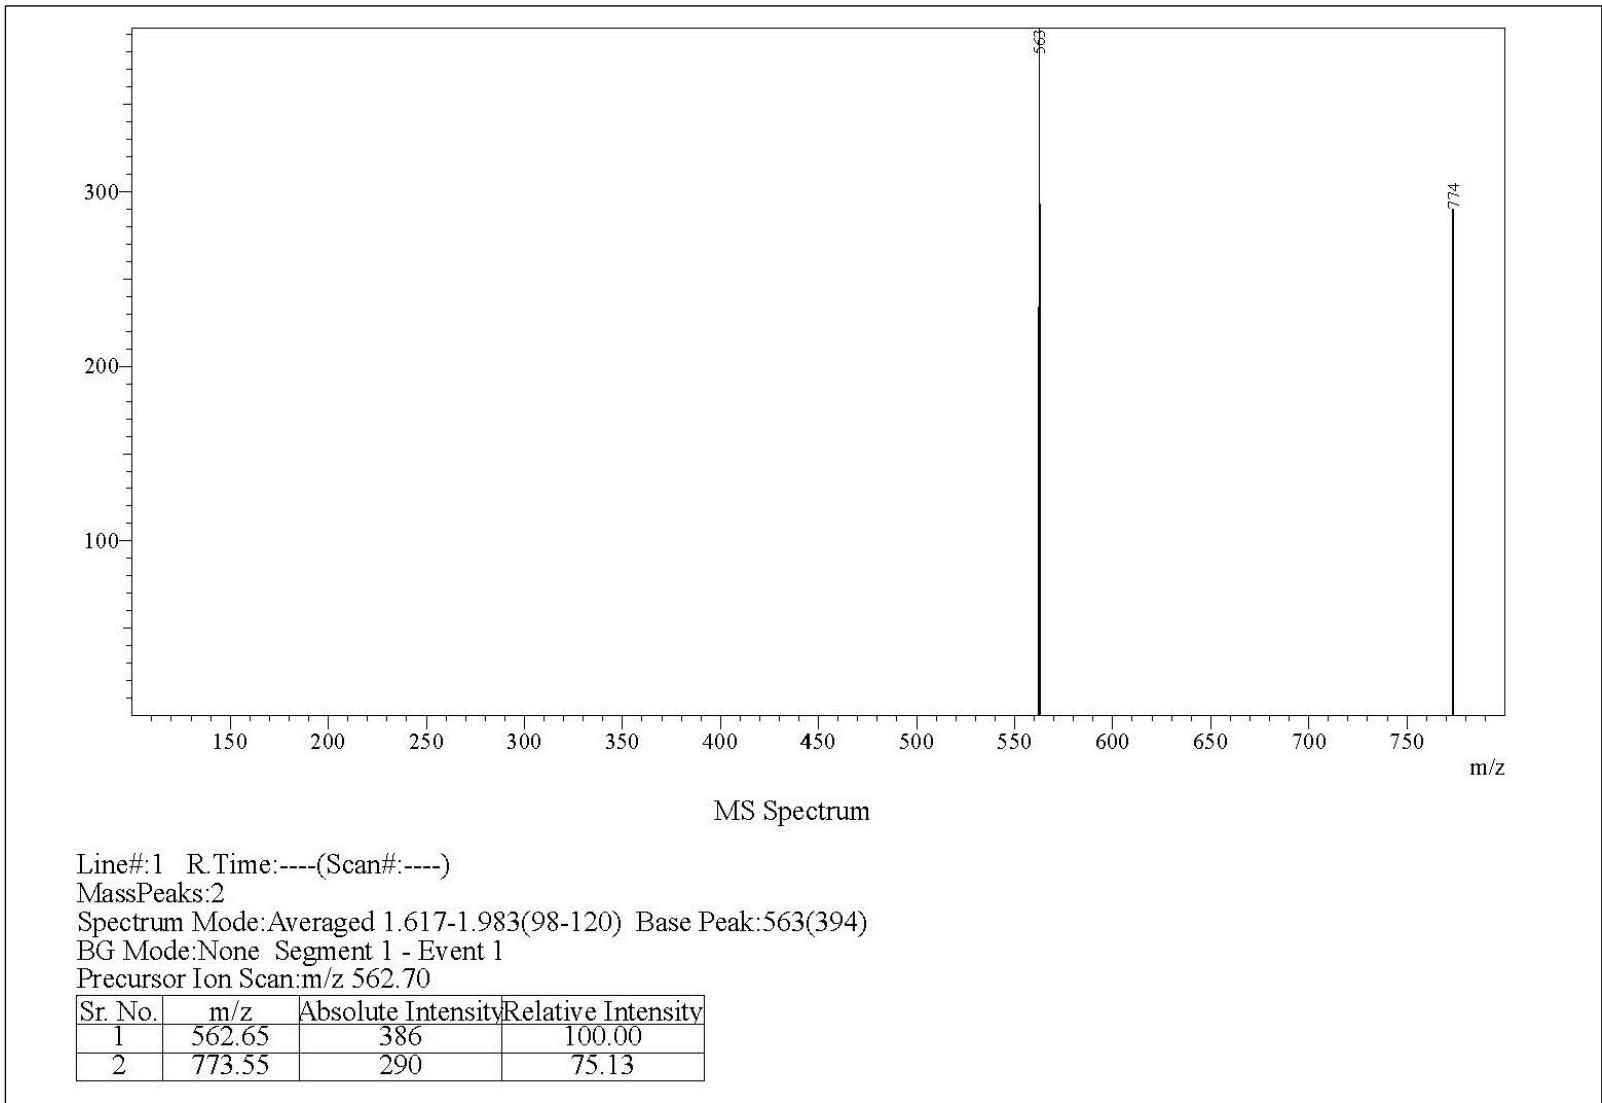

<sup>1</sup>H NMR of compound 4c

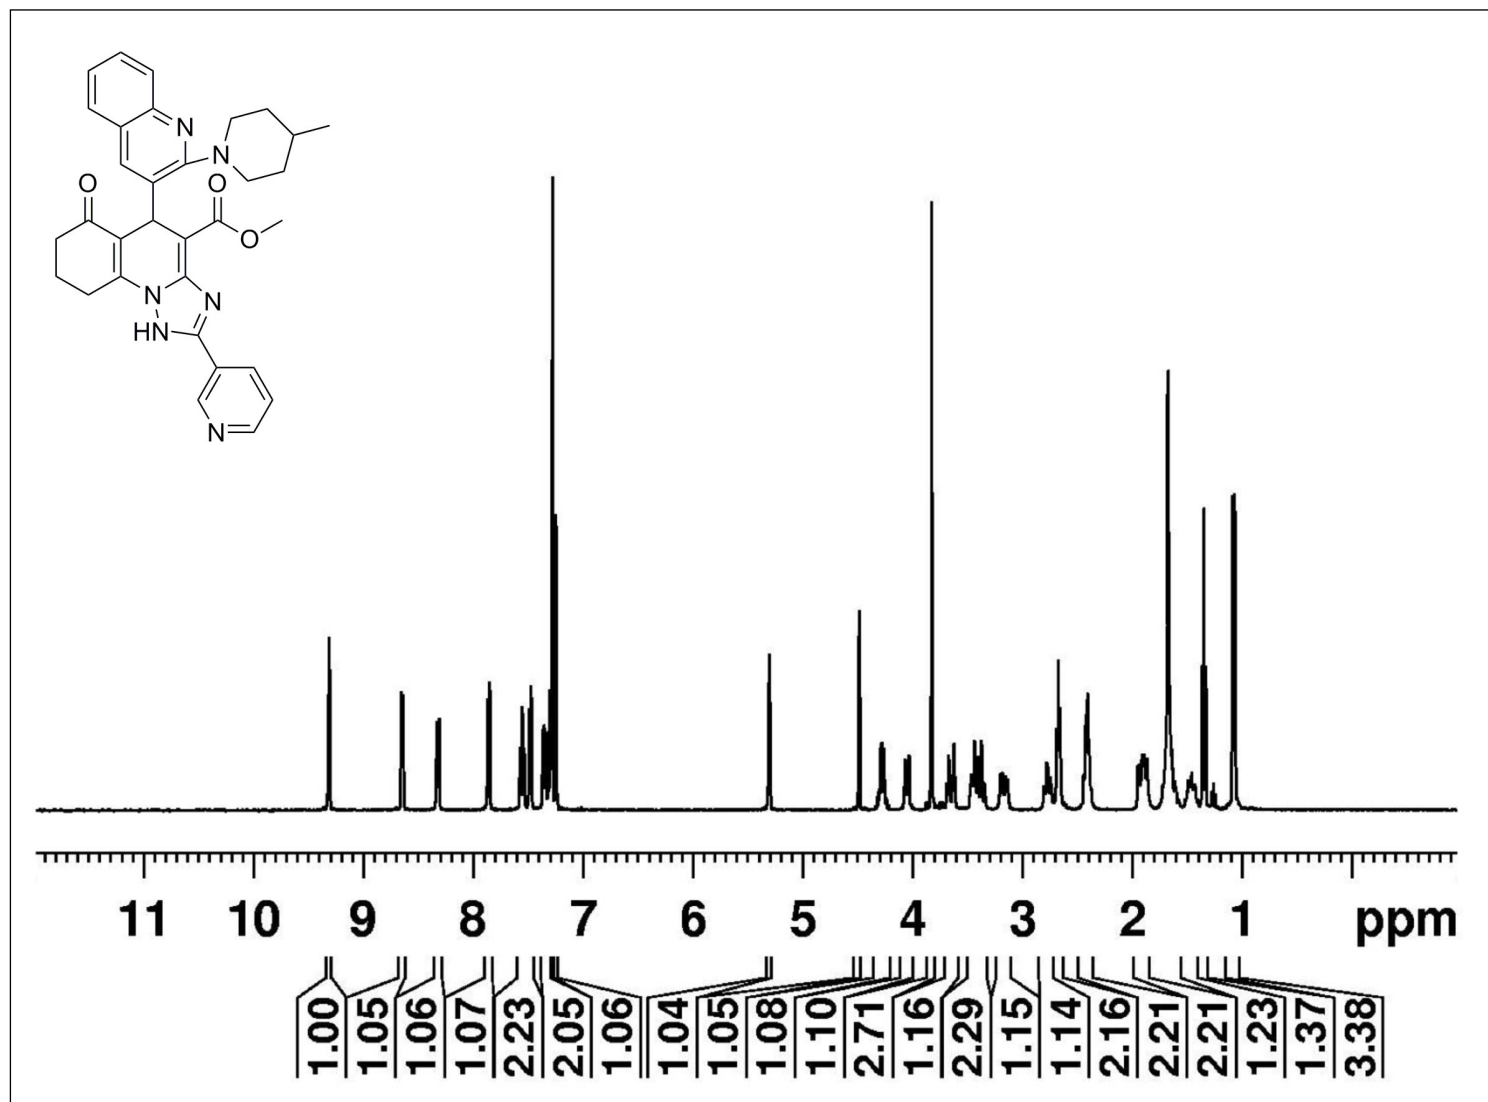

Mass of compound 4c

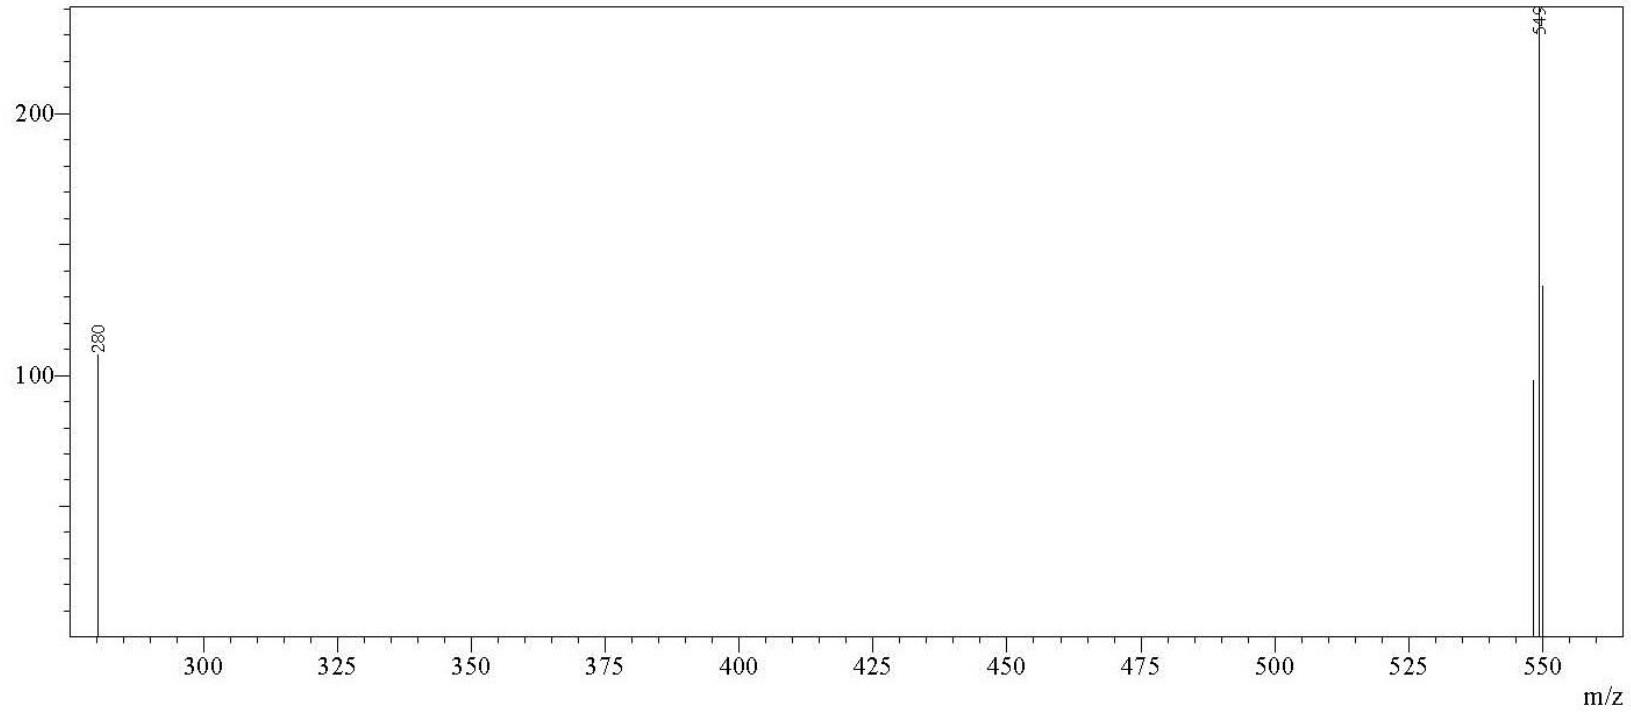

MS Spectrum

Line#:1 R.Time:----(Scan#:----)

MassPeaks:4

Spectrum Mode:Averaged 0.133-0.883(9-54) Base Peak:549(241)

BG Mode:None Segment 1 - Event 1

Precursor Ion Scan:m/z 548.00

| Sr. No. | m/z    | Absolute Intensity | Relative Intensity |
|---------|--------|--------------------|--------------------|
| 1       | 280.20 | 108                | 44.81              |
| 2       | 548.20 | 98                 | 40.66              |
| 3       | 549.30 | 241                | 100.00             |
| 4       | 550.00 | 134                | 55.60              |



<sup>1</sup>H NMR of compound 4d

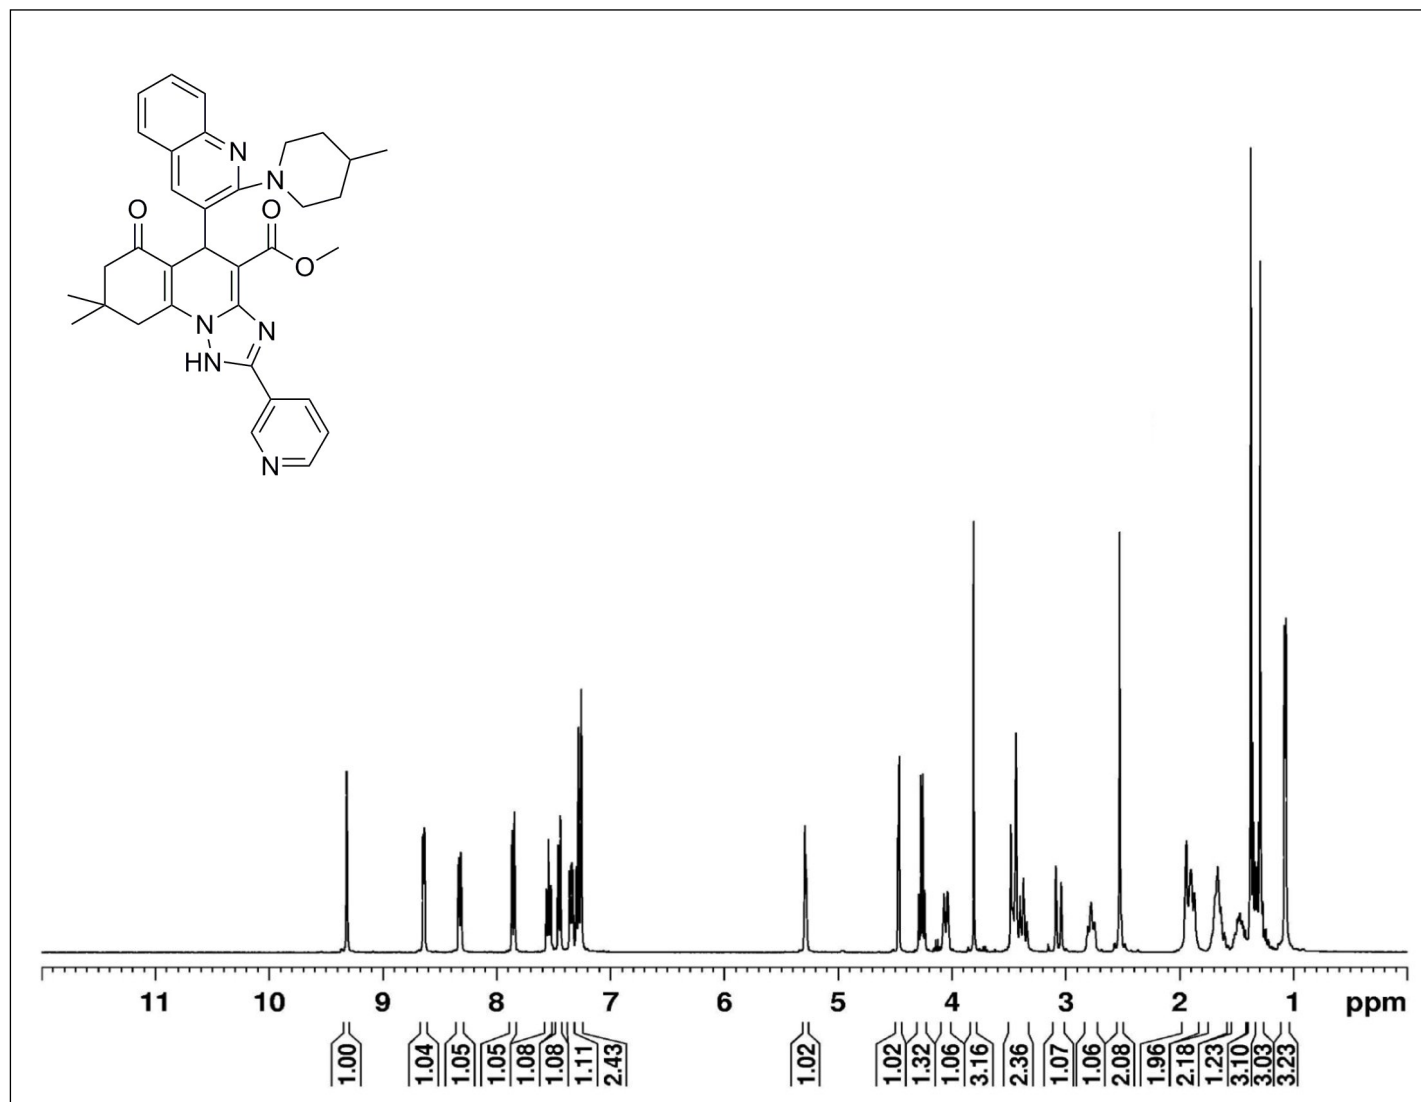

<sup>13</sup>C NMR of compound 4d

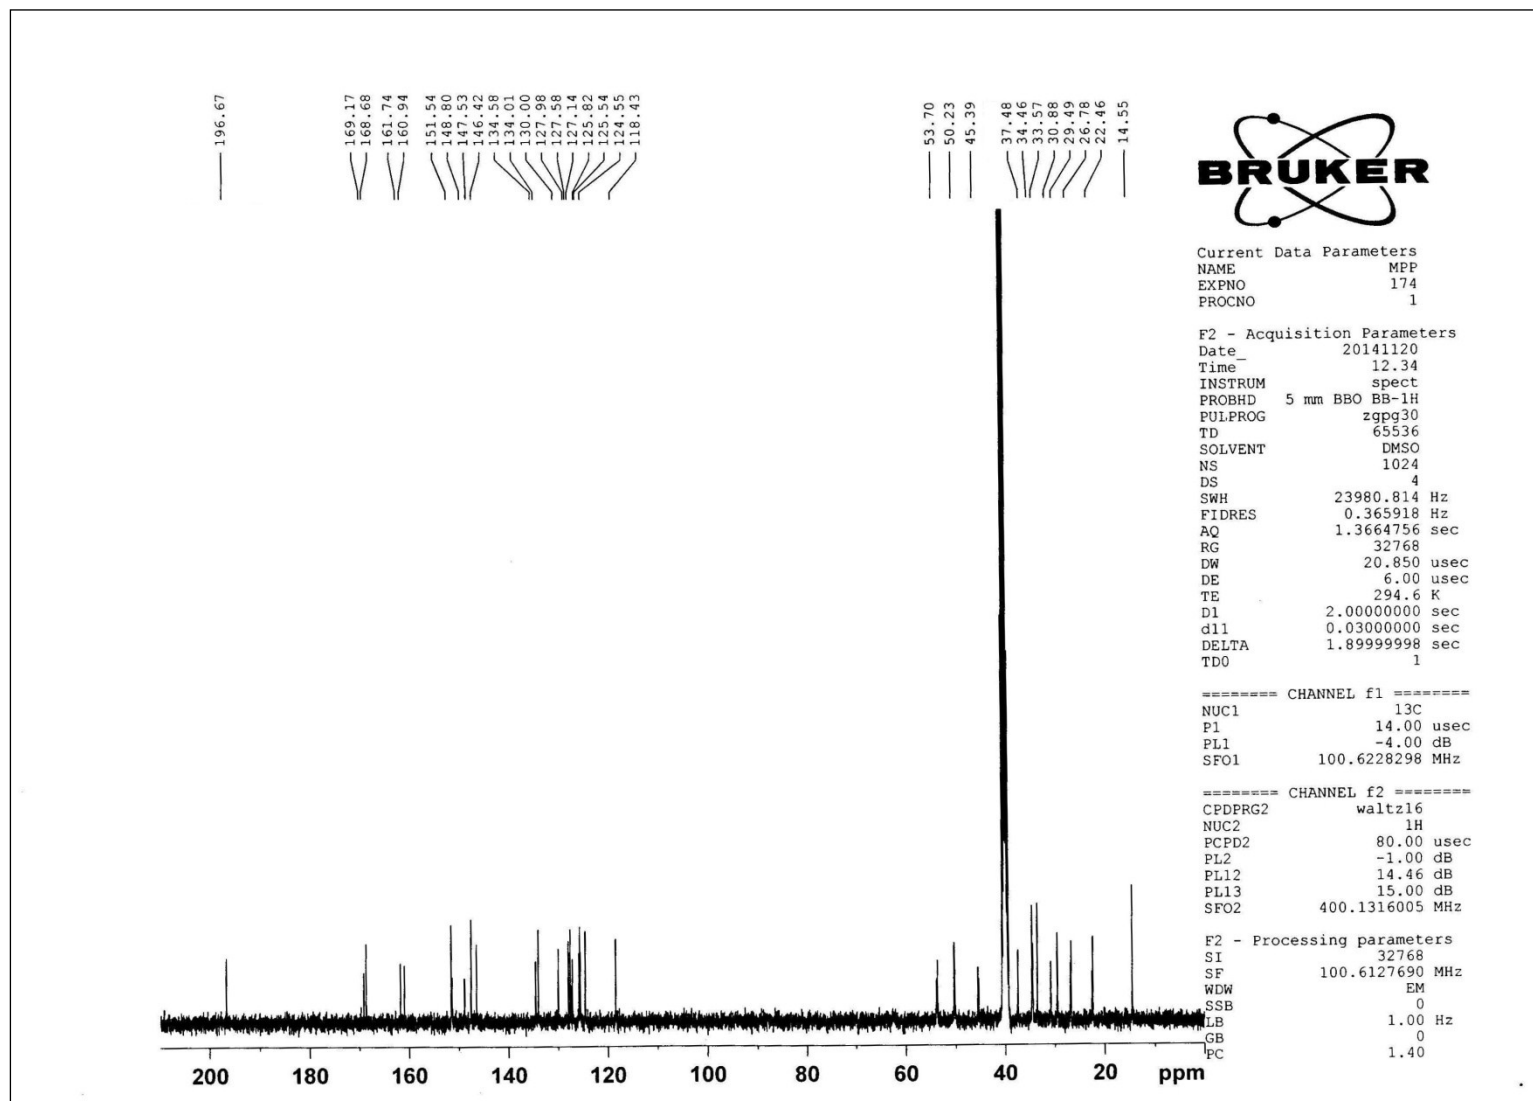

Mass of compound 4d

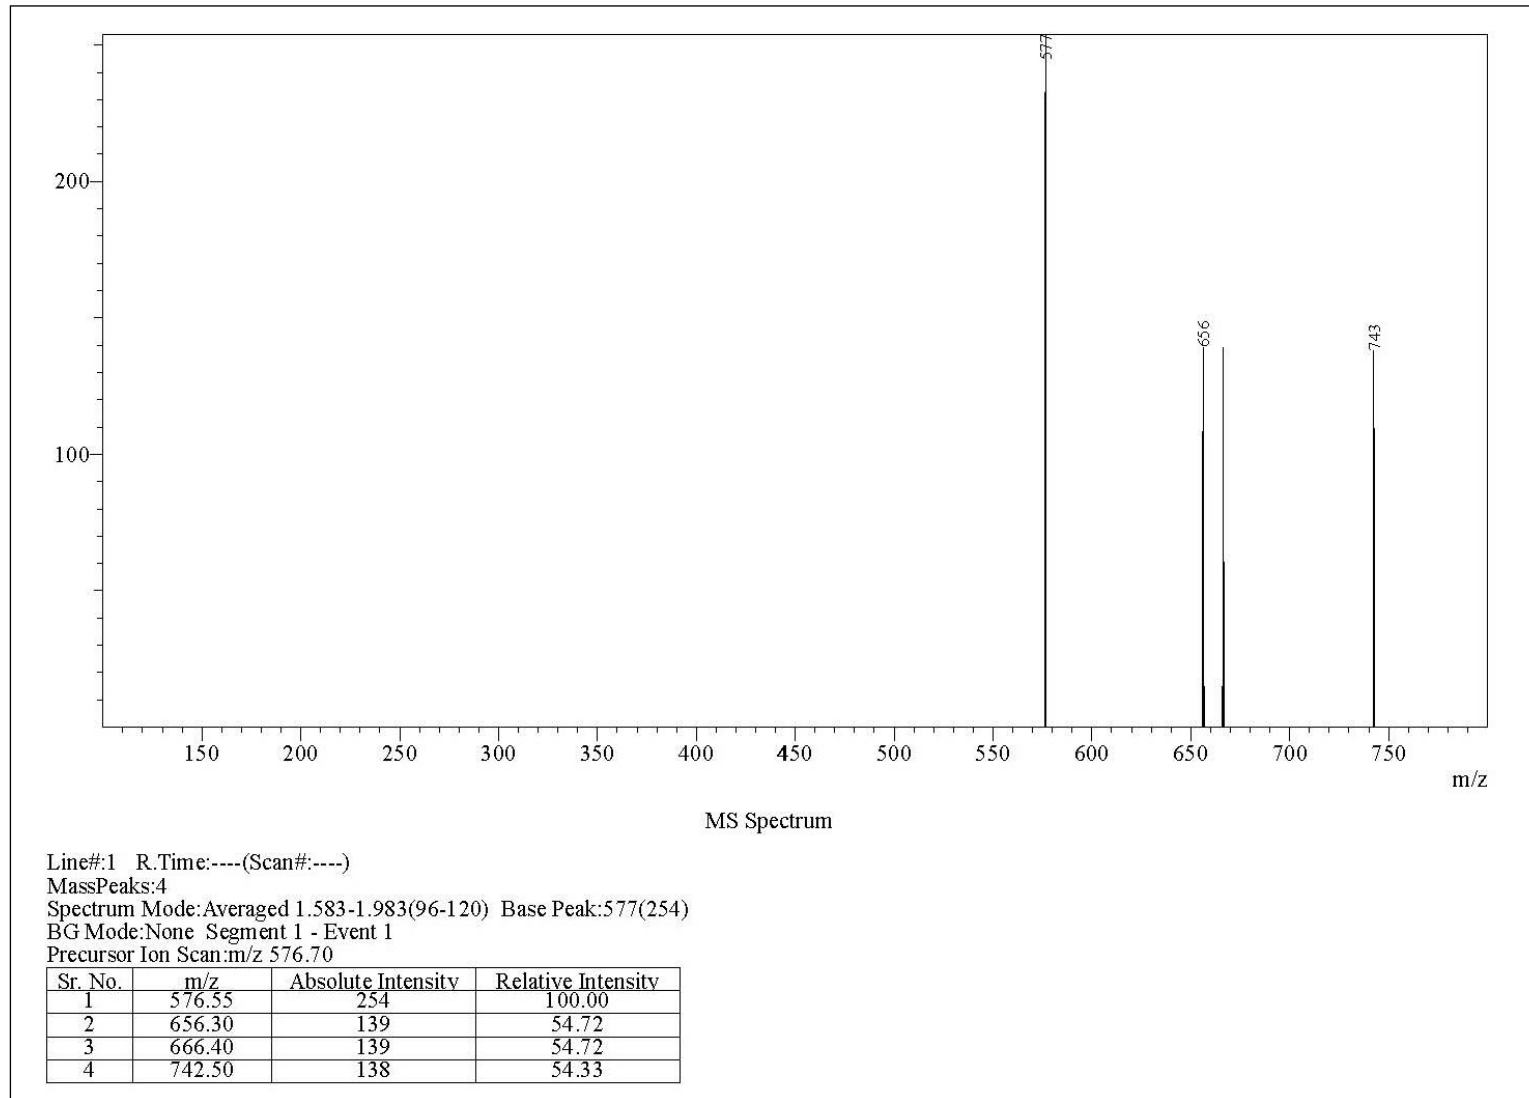

<sup>1</sup>H NMR of compound 4e

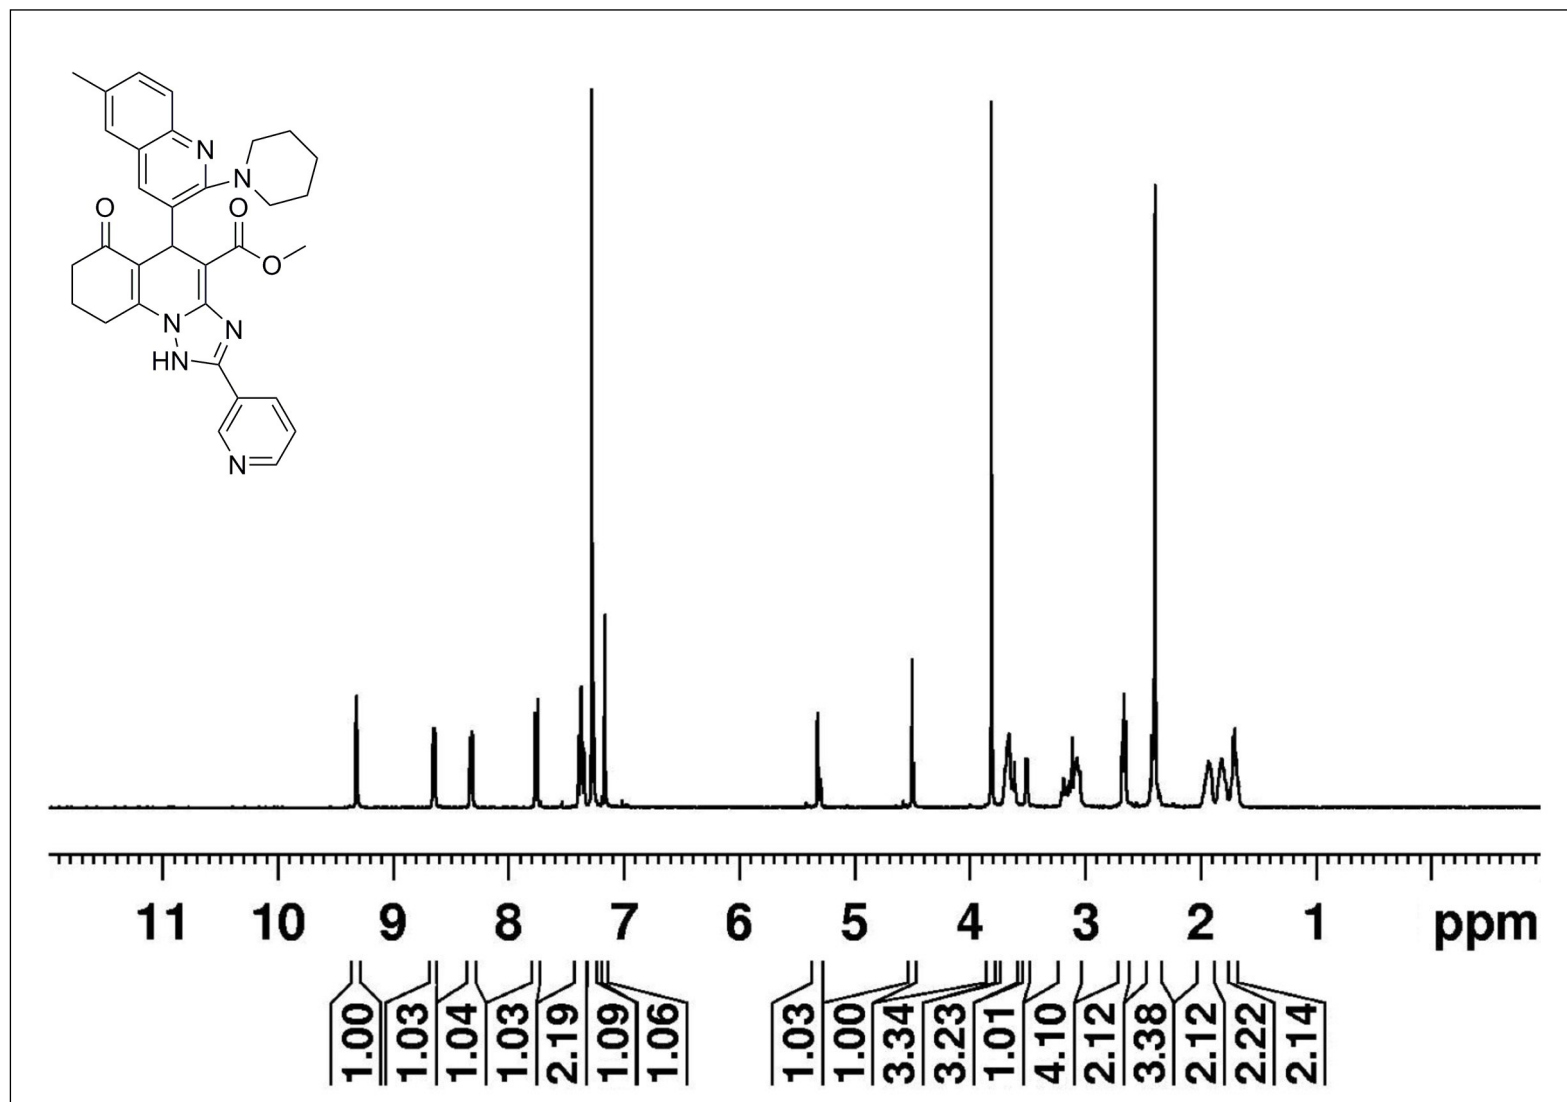

<sup>1</sup>H NMR of compound 4f

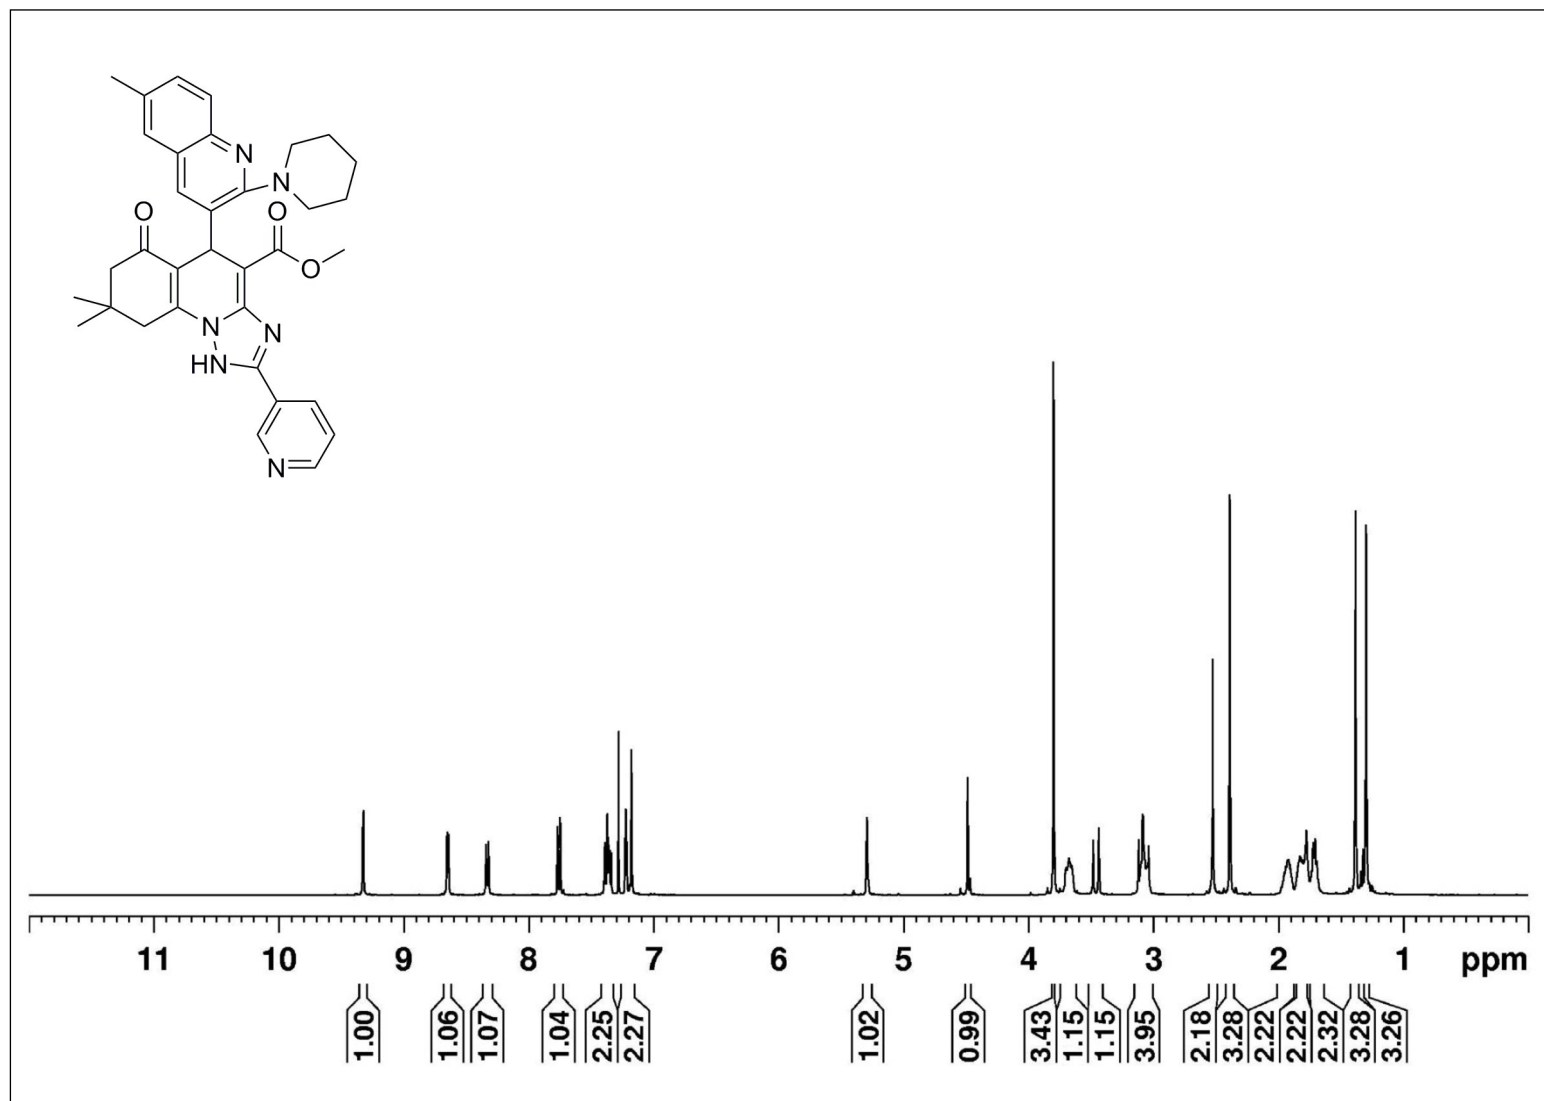

<sup>1</sup>H NMR of compound 4g

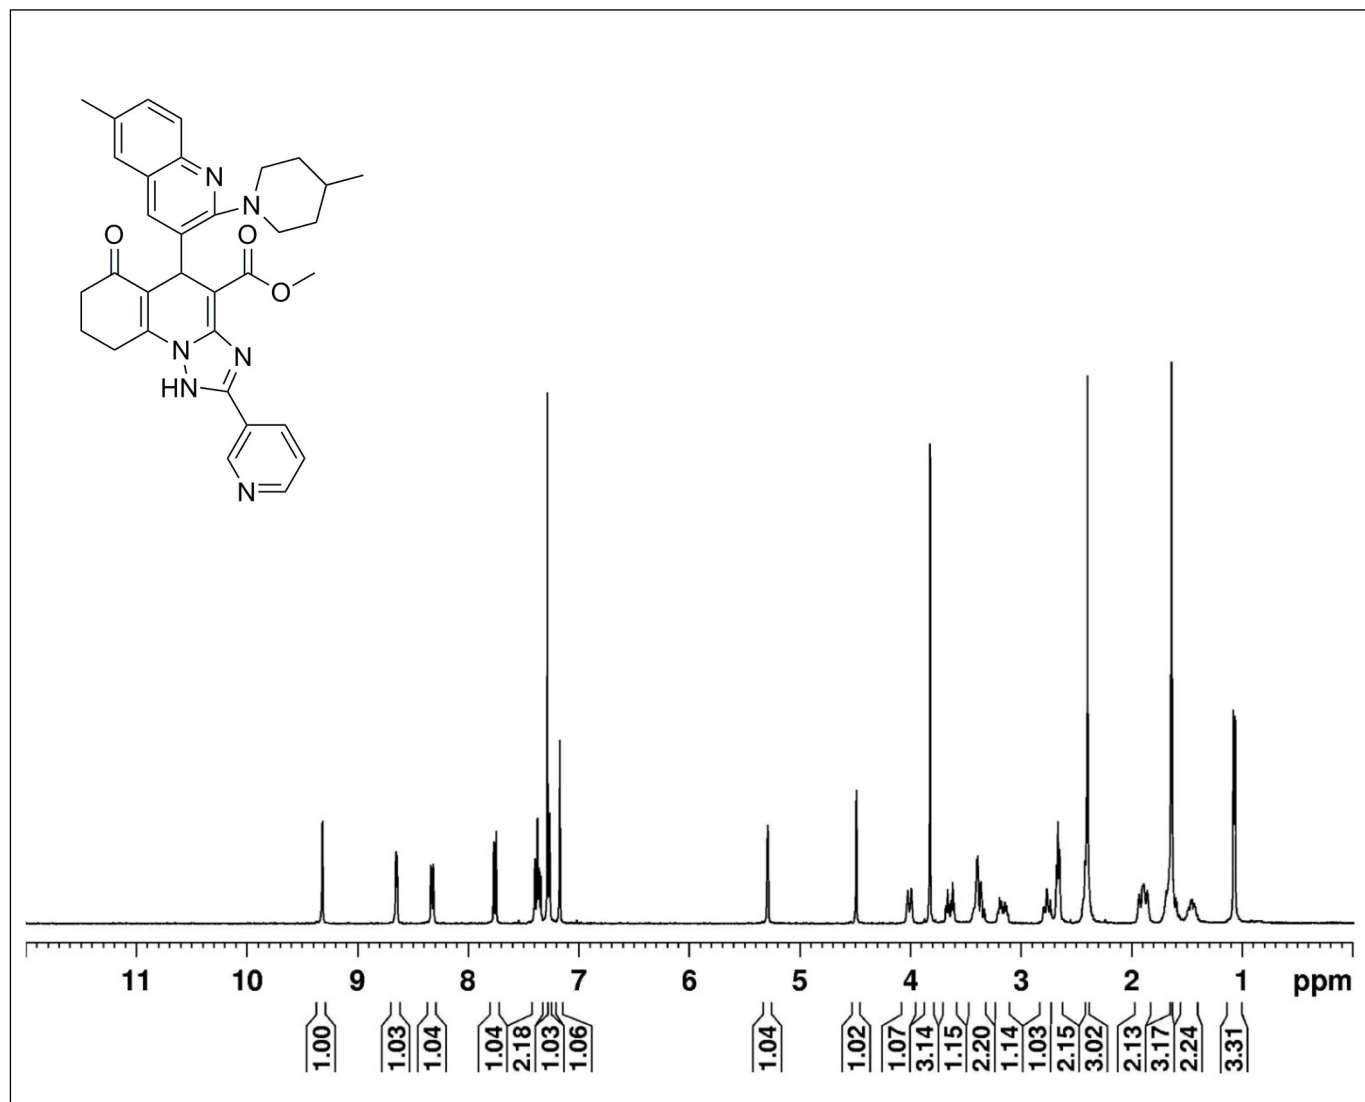

<sup>1</sup>H NMR of compound 4h

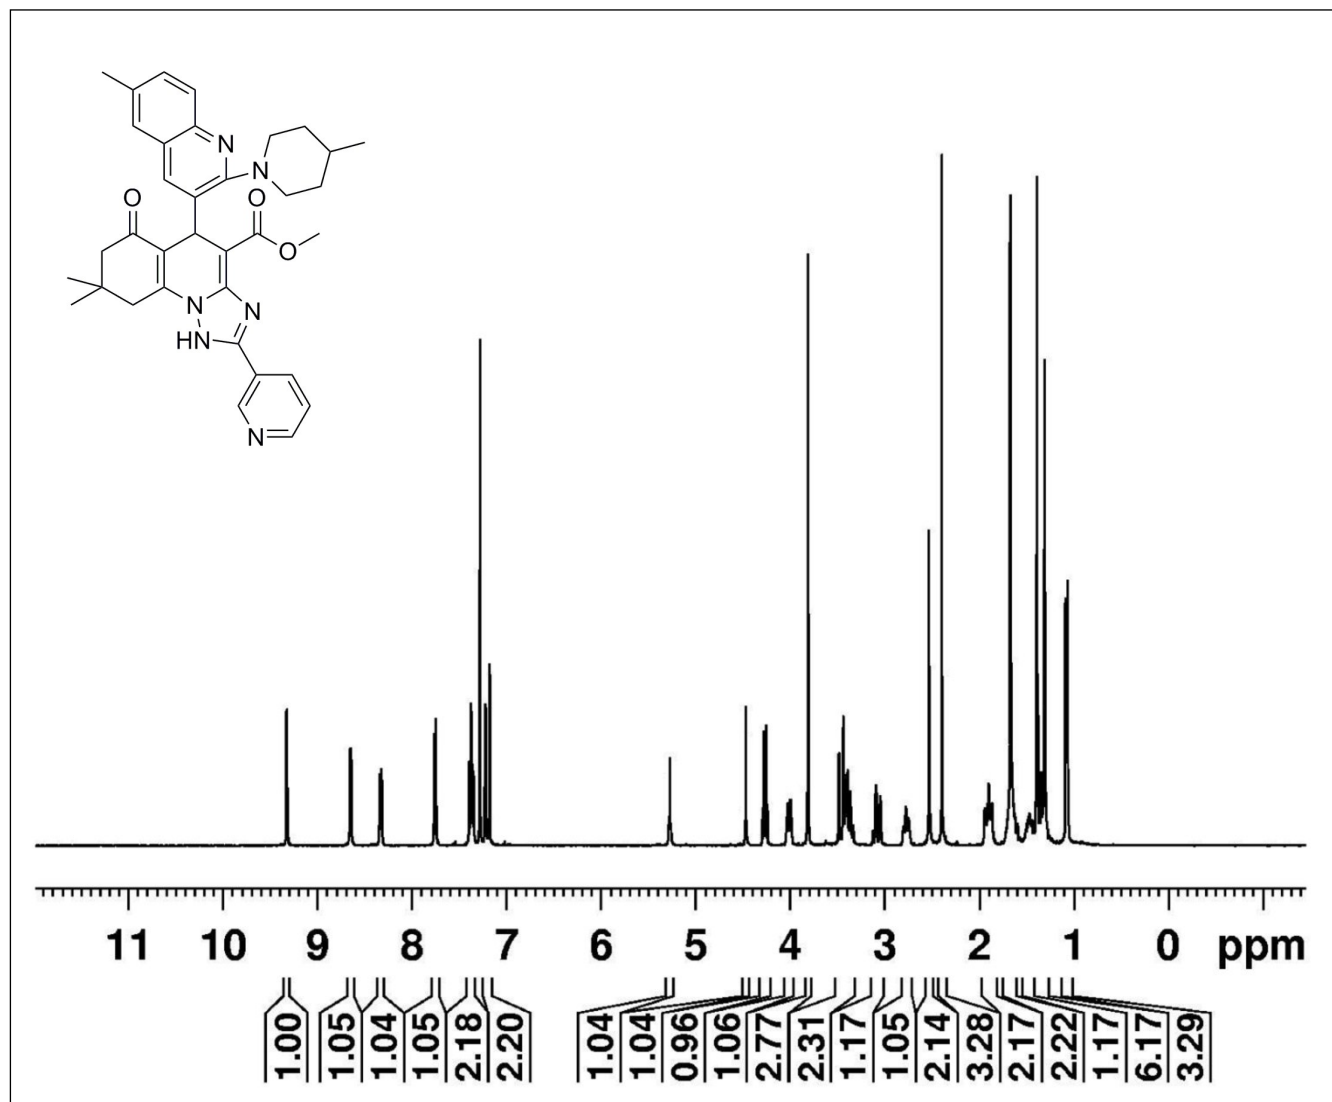

<sup>1</sup>H NMR of compound 4i

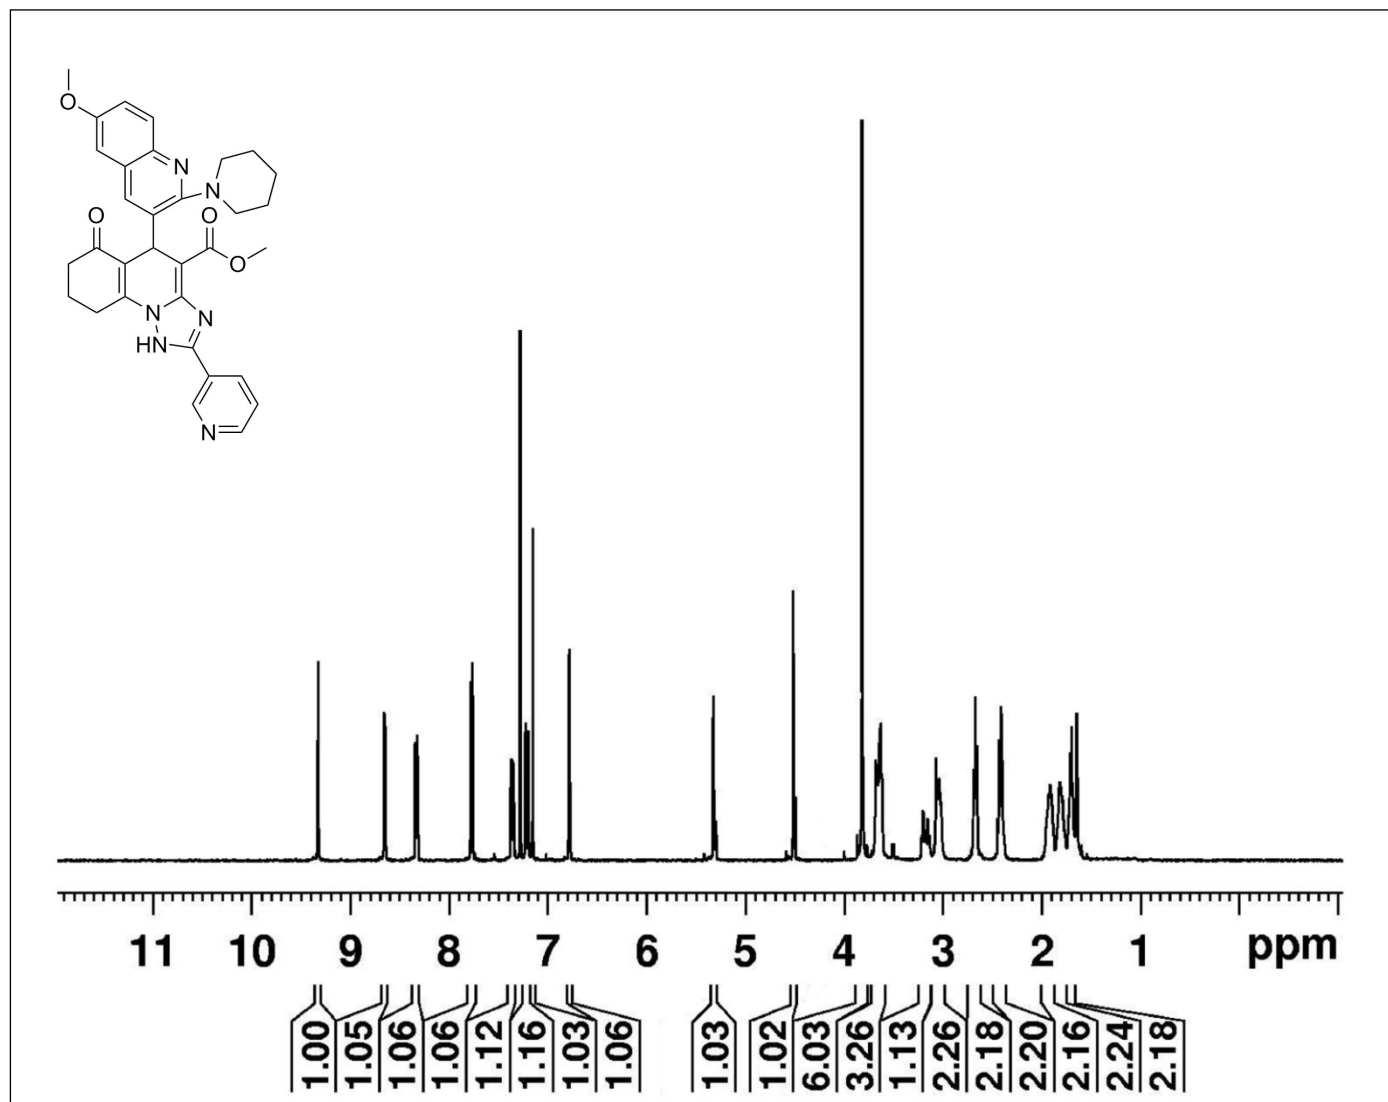



<sup>13</sup>C NMR of compound 4i

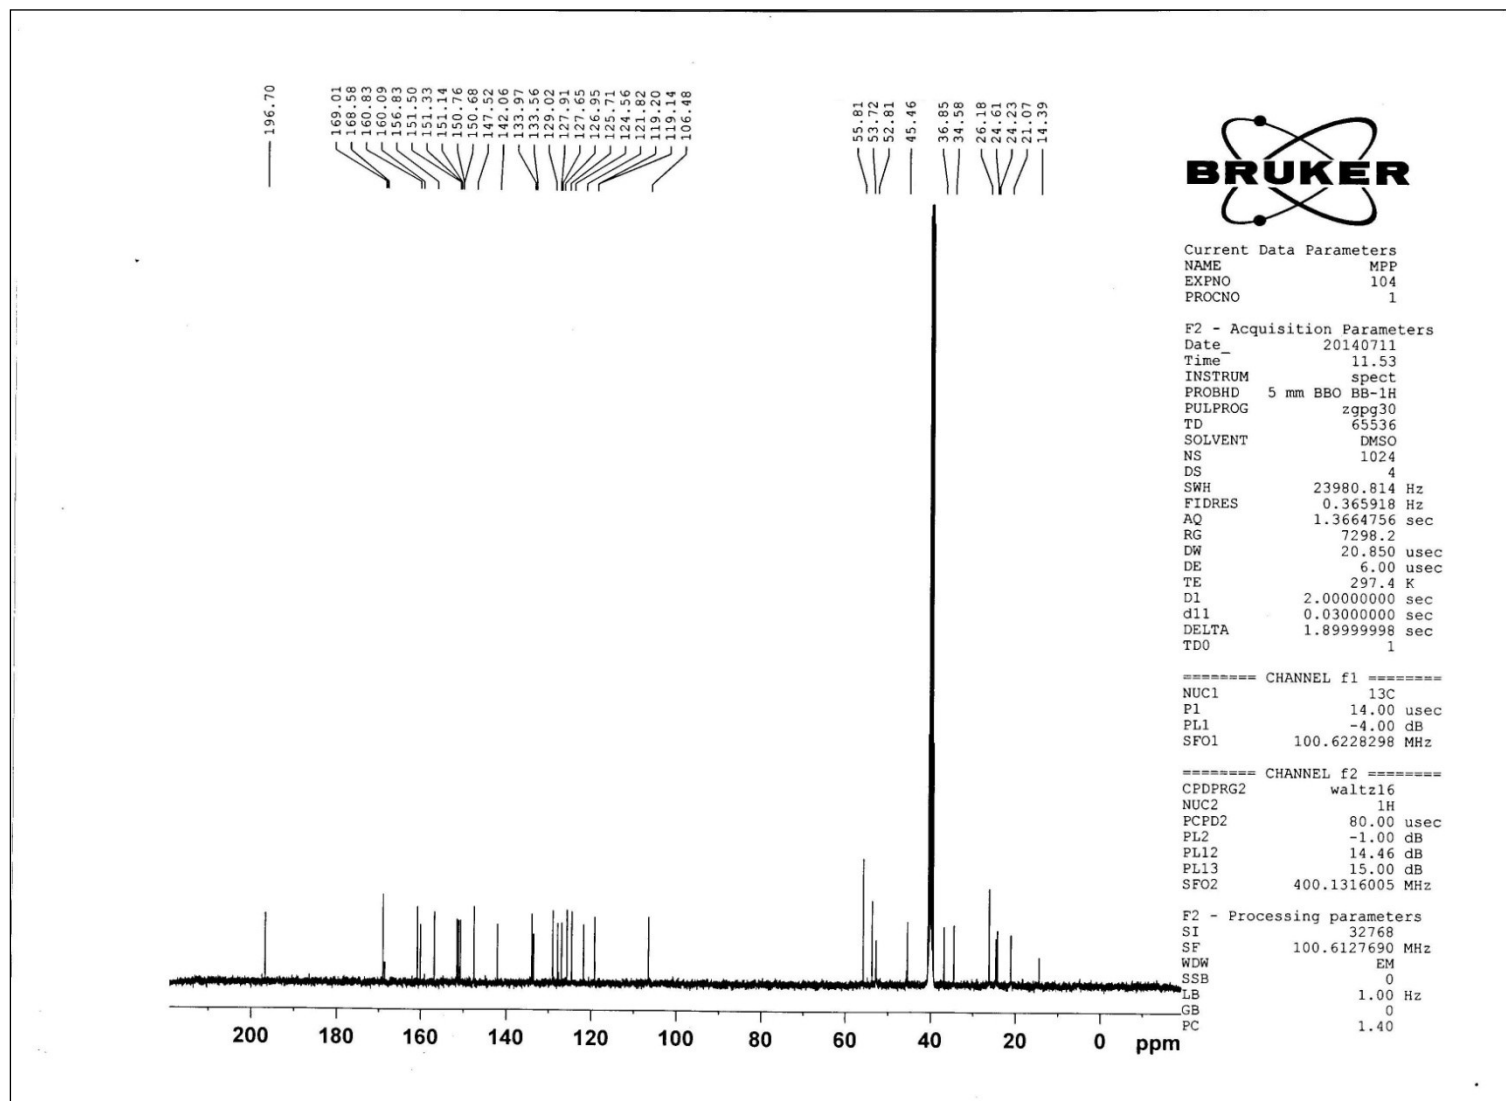

<sup>1</sup>H NMR of compound 4j

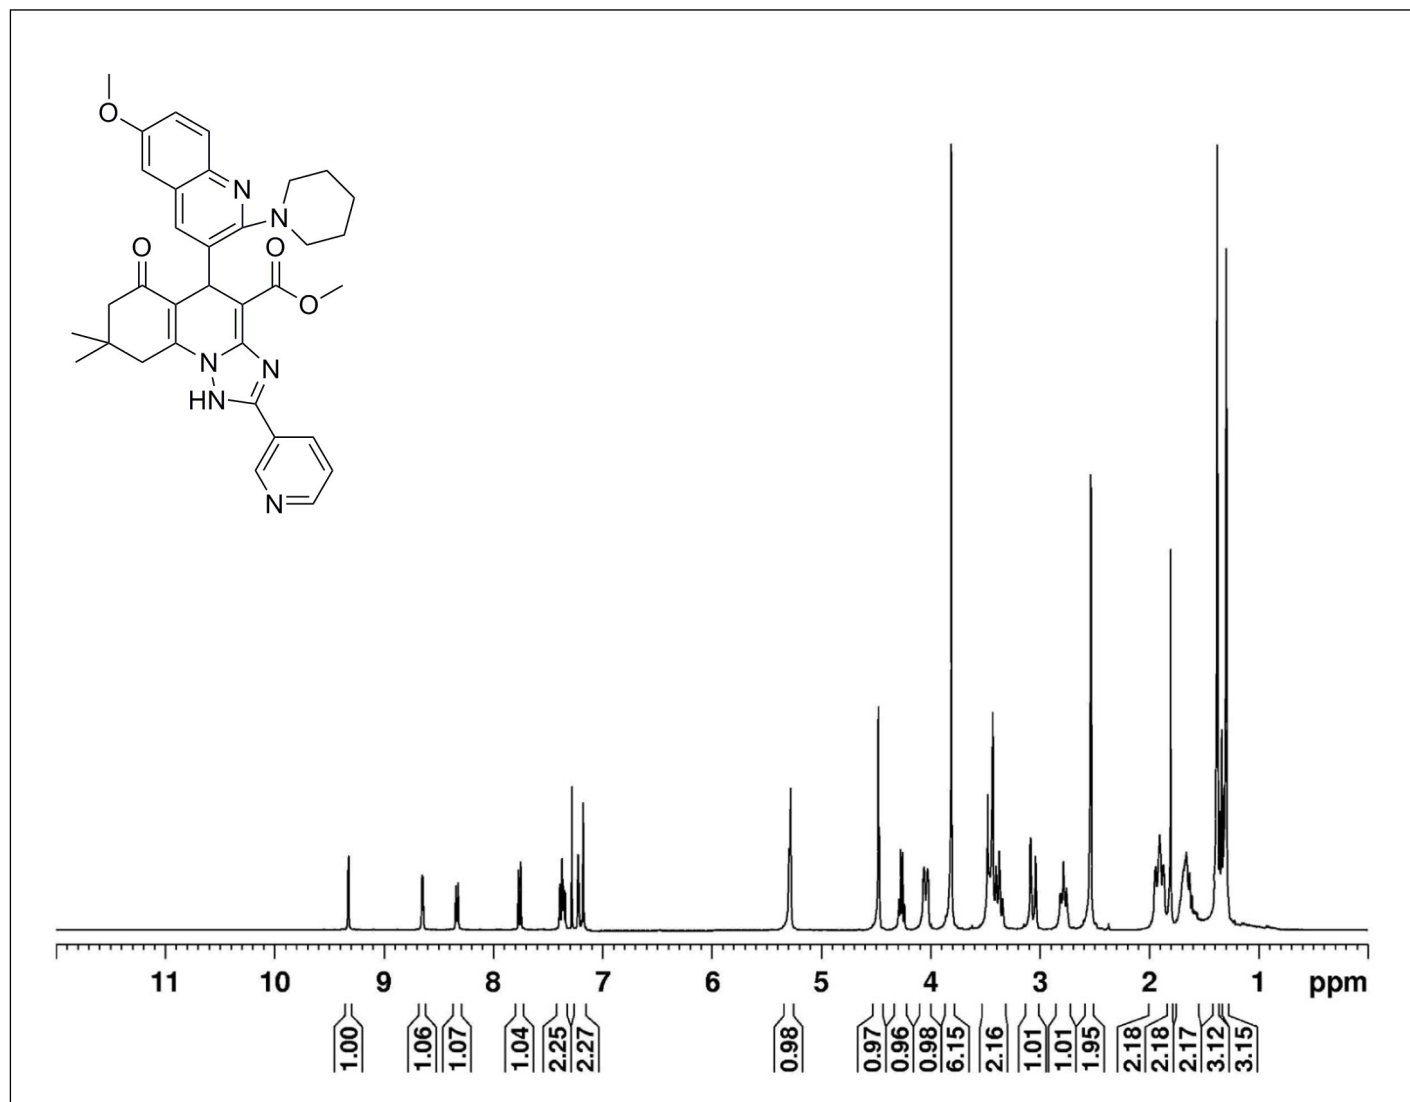

<sup>1</sup>H NMR of compound 4k

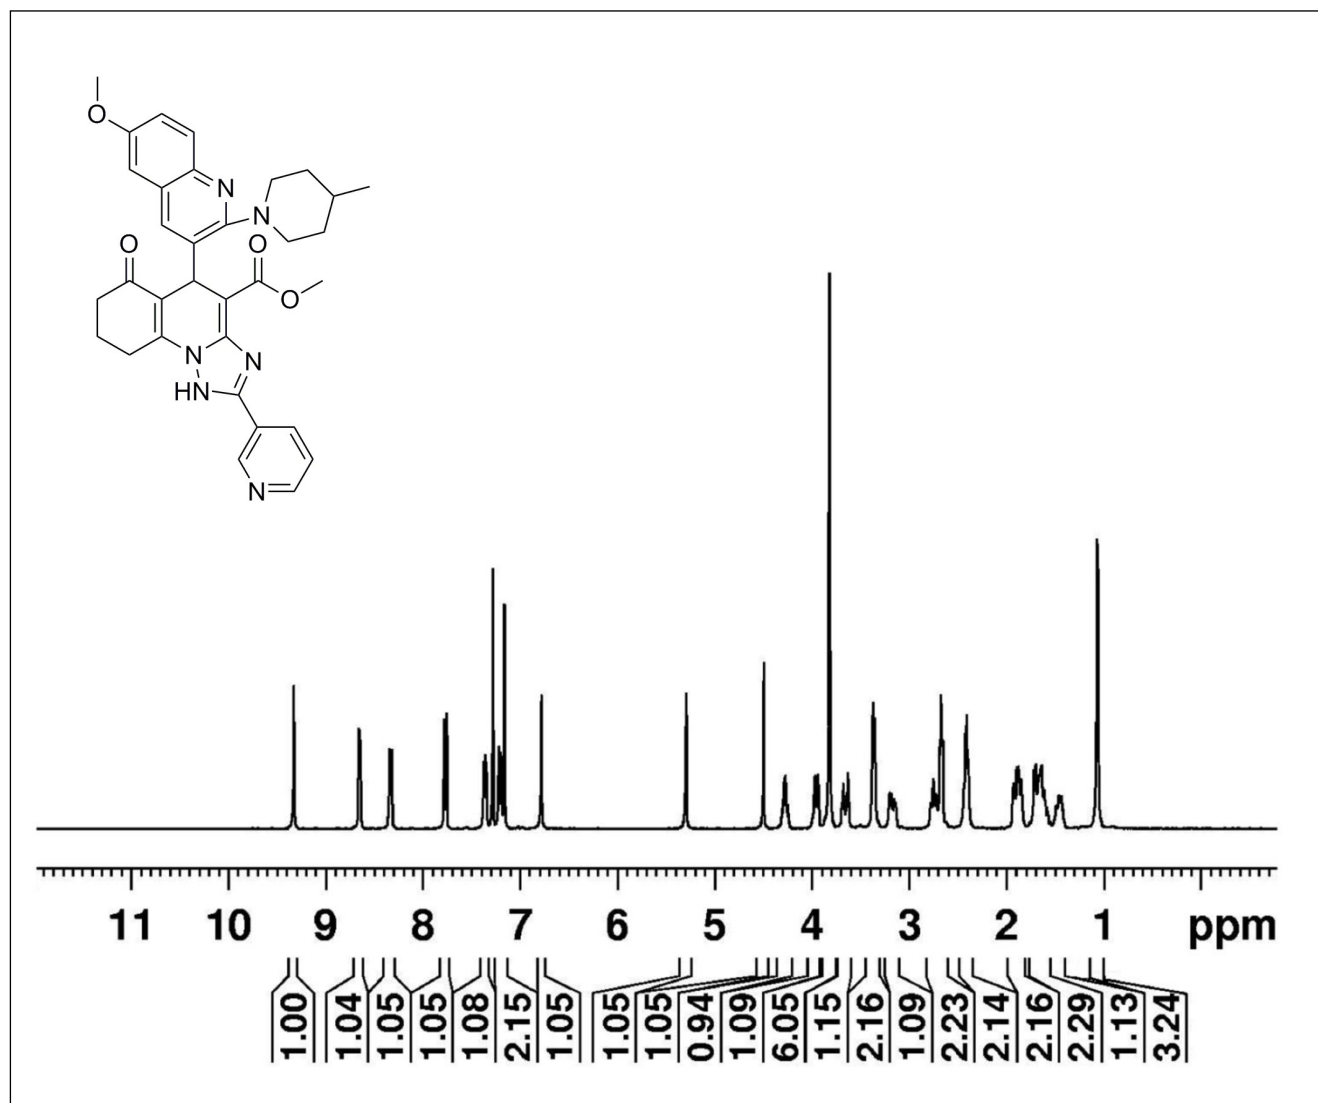

<sup>1</sup>H NMR of compound 41

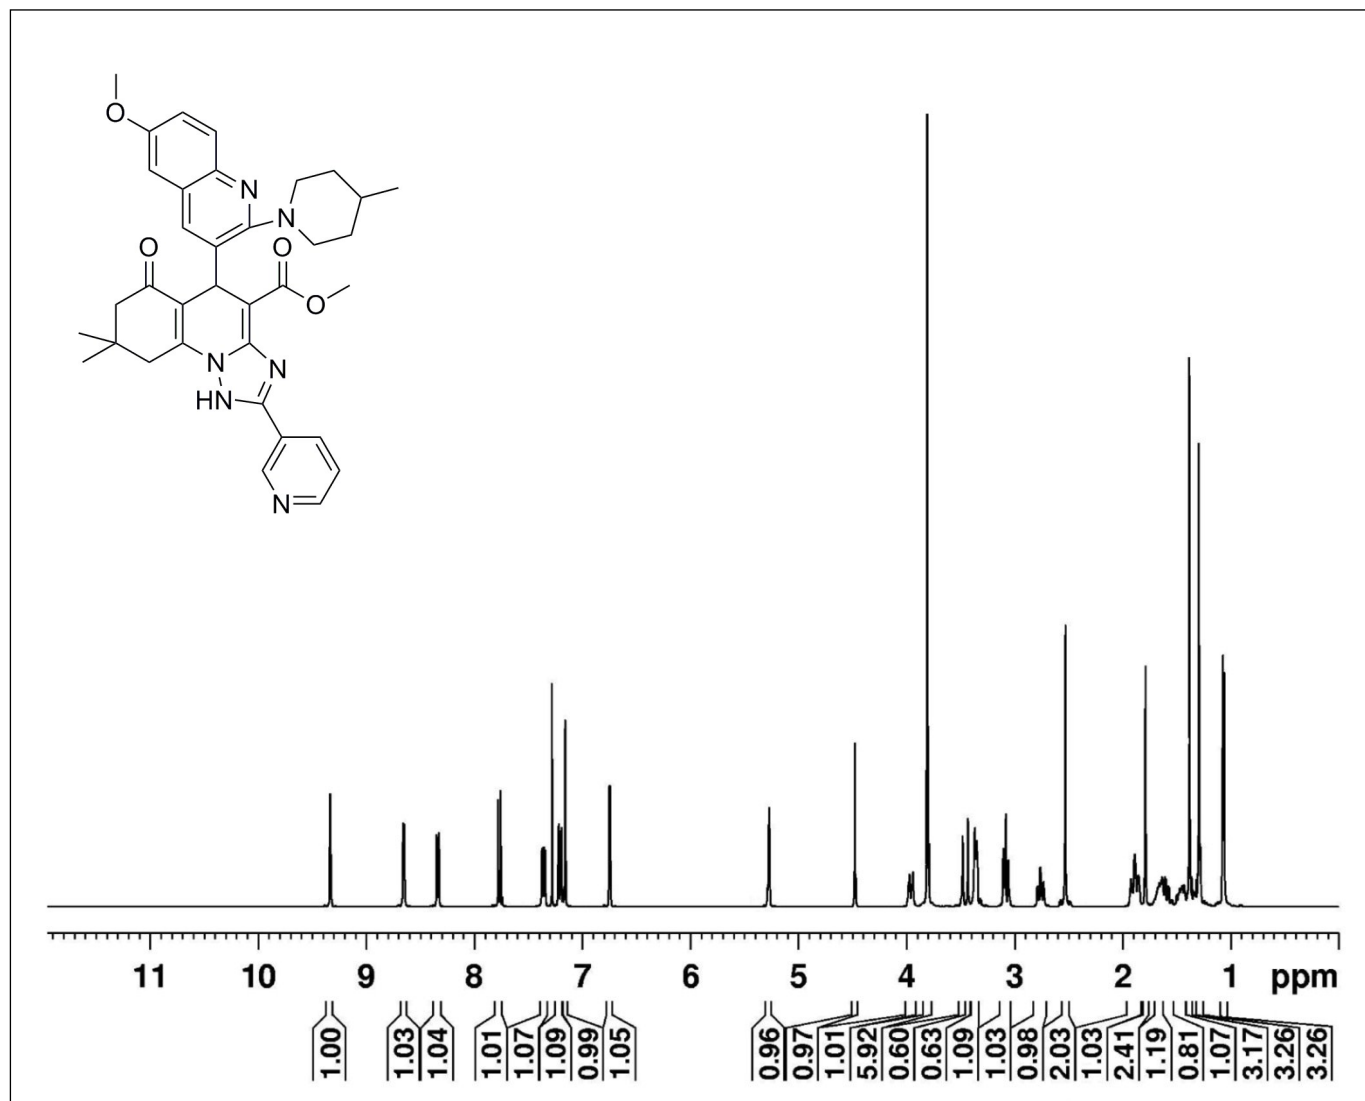

Mass of compound 4l

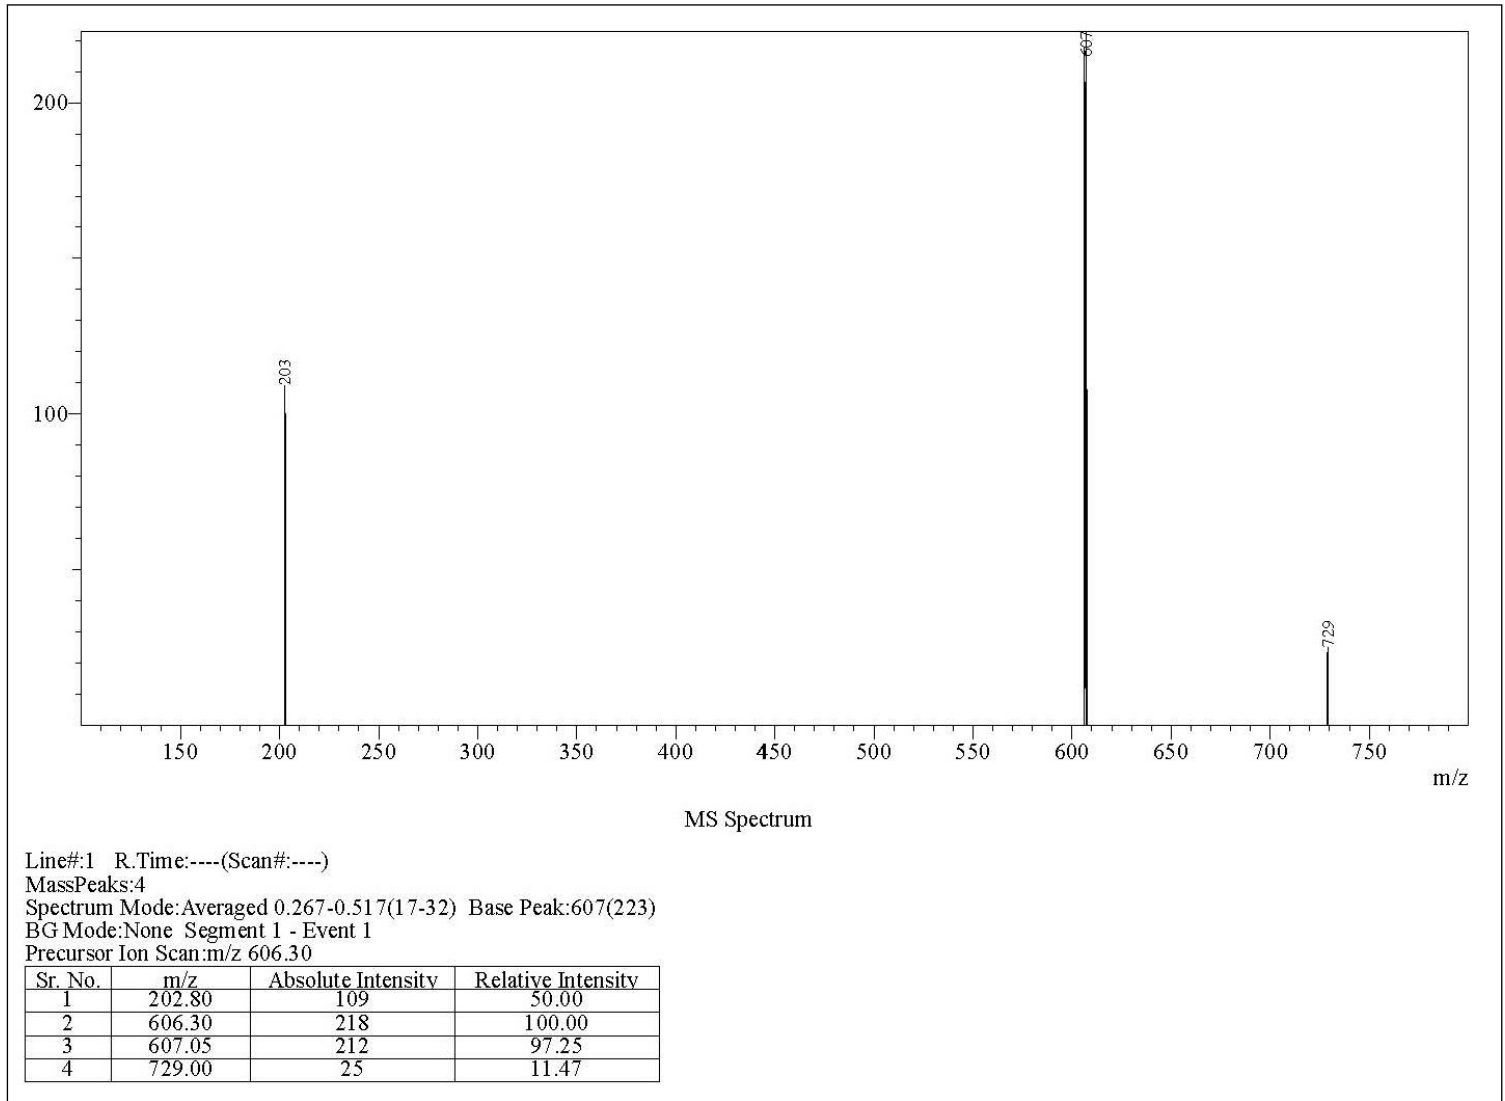

<sup>1</sup>H NMR of compound 5a

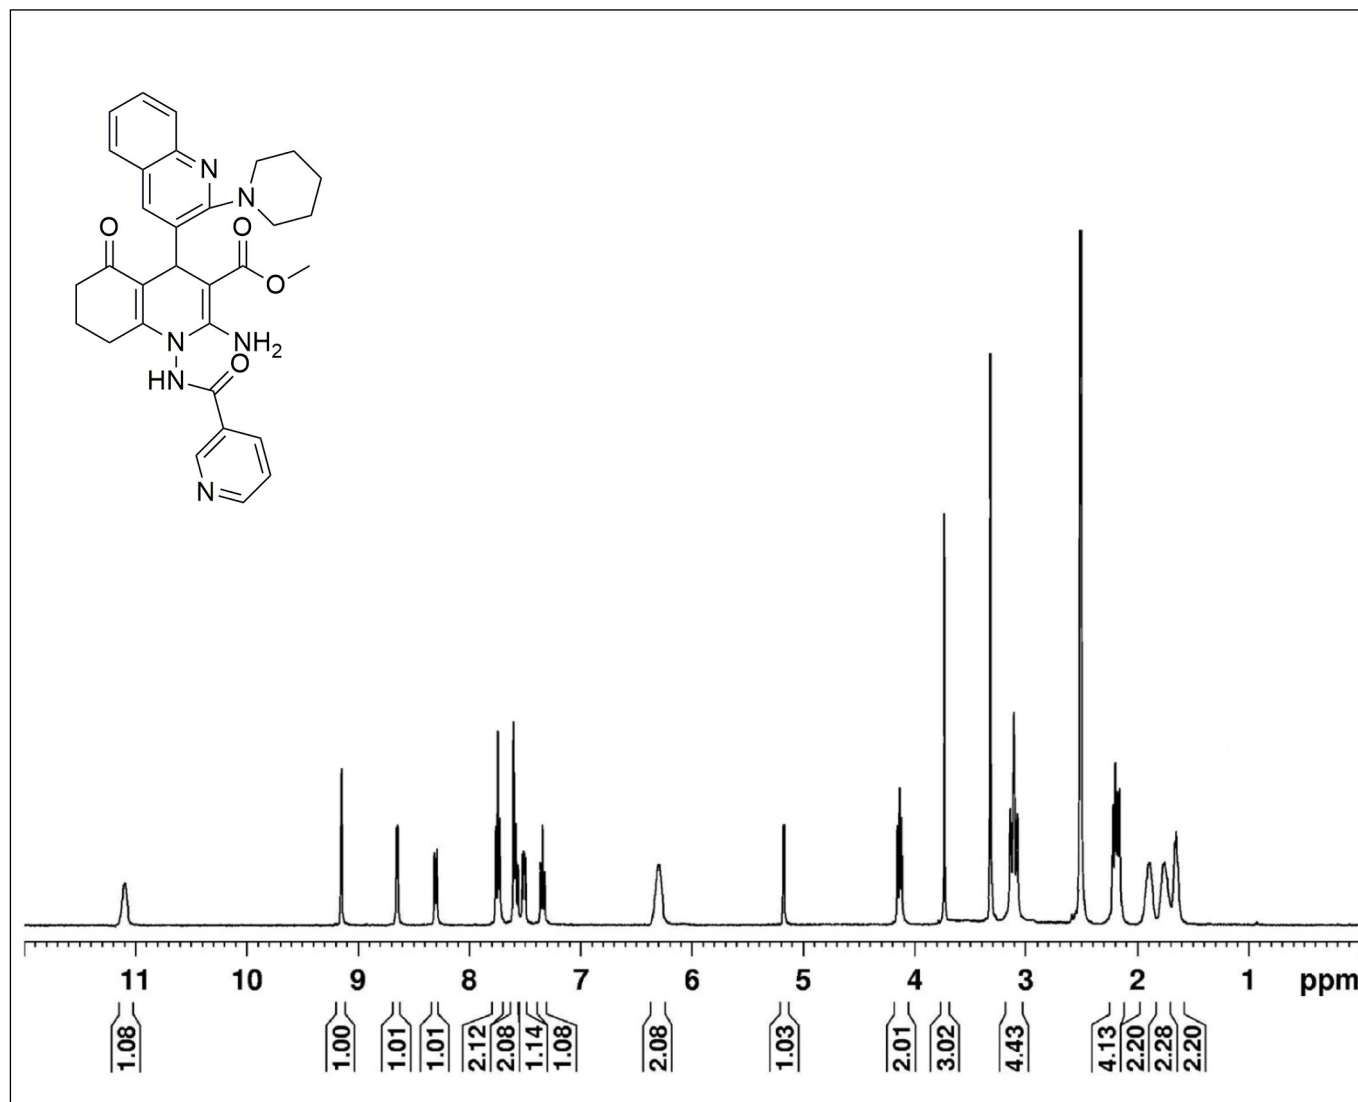

<sup>13</sup>C NMR of compound 5a

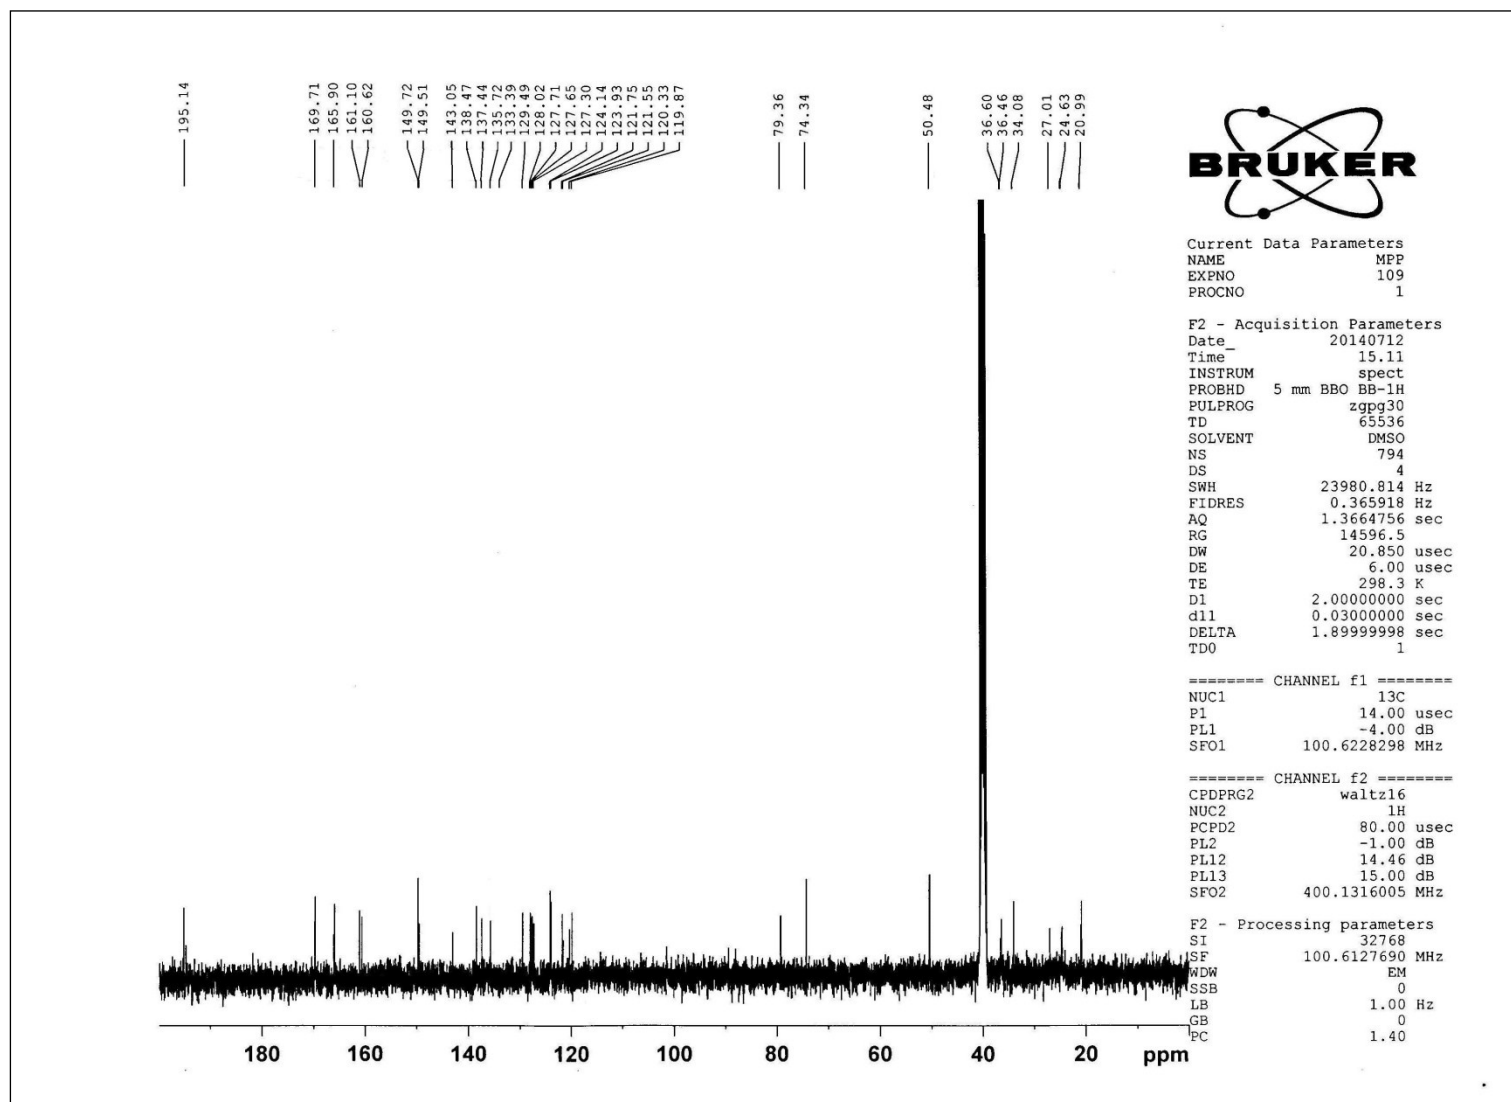

Mass of compound 5a

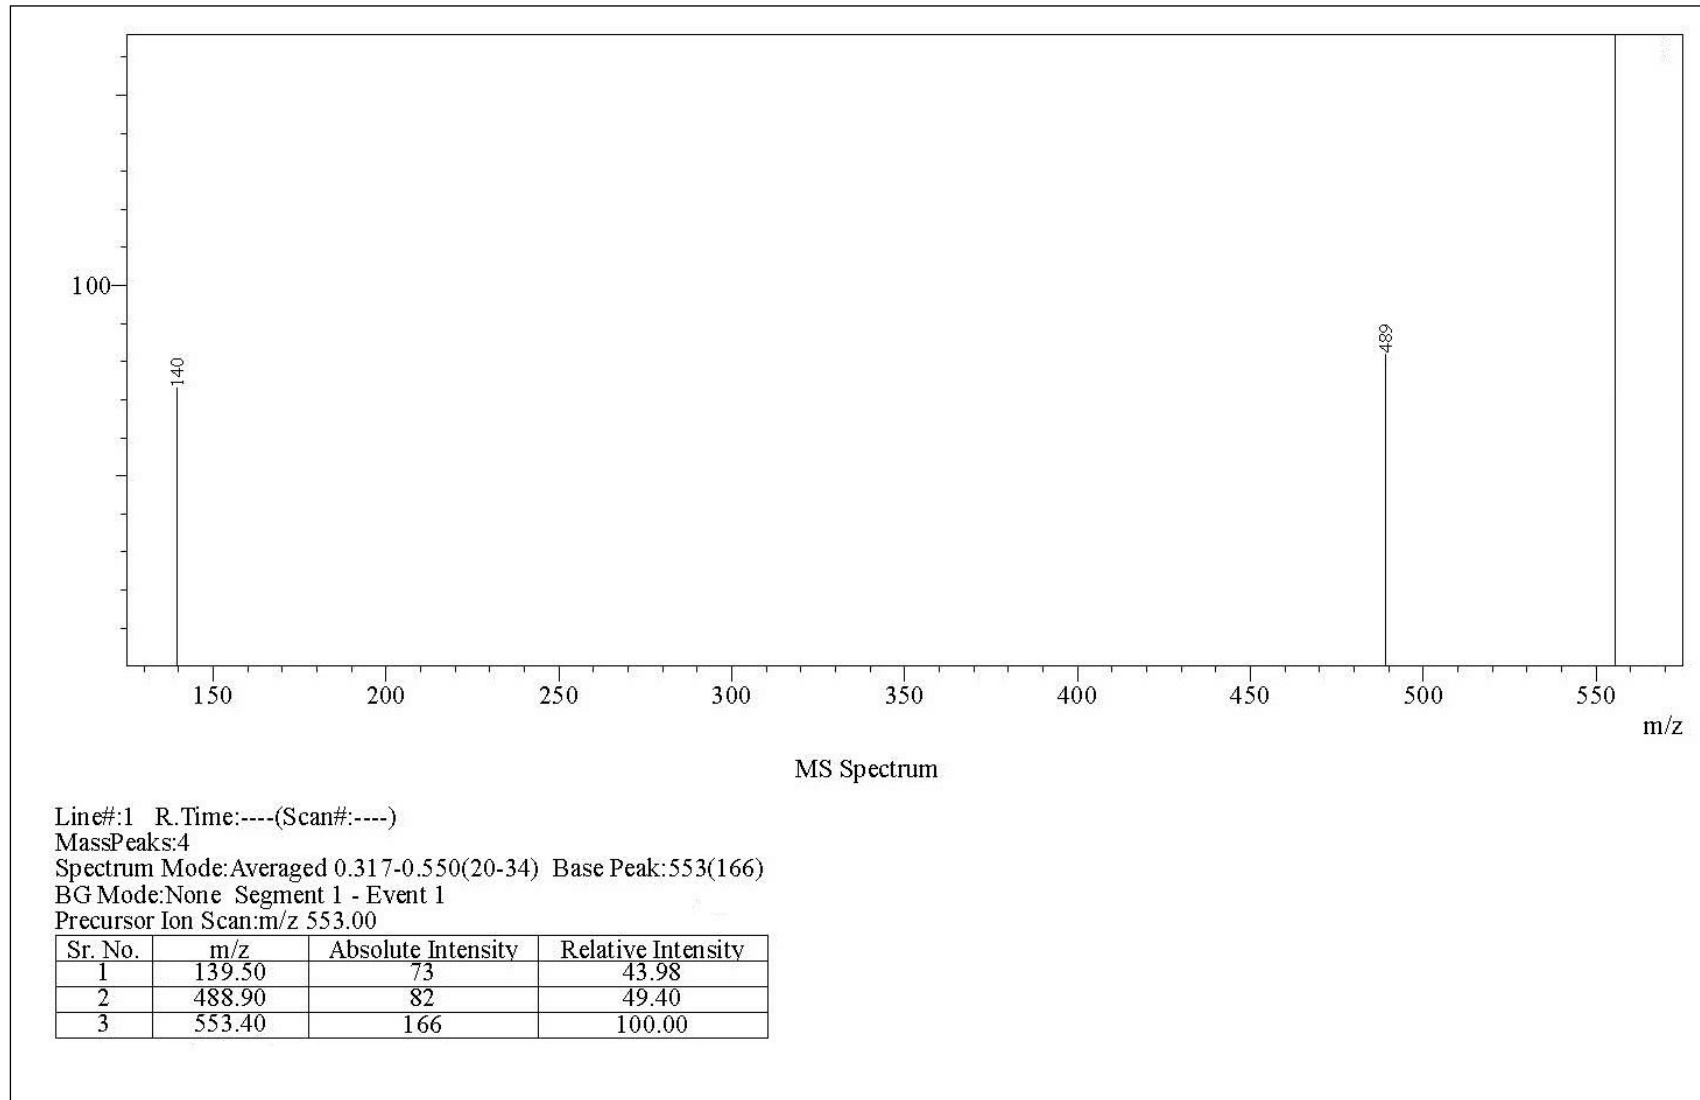

Supplement: c5ra15560f1.pdf [file c5ra15560f1.pdf]
